# Supplementary material for: Lipase catalyzed desymmetrization of roof shape cis-11,12-bis(hydroxymethyl)-9,10-dihydro-9,10-ethanoanthracene
Source: Royal Society of Chemistry journal article supplement (doi:10.1039/c5ra11626k), 2015-01-01
Supplement: c5ra11626k1.pdf [file c5ra11626k1.pdf]

## *Supporting Information*

### **Lipase catalyzed desymmetrization of roof shape *cis*-11,12-bis(hydroxymethyl)-9,10-dihydro-9,10-ethanoanthracene**

Nilesh Jain and Ashutosh V. Bedekar\*

|                                                           |         |
|-----------------------------------------------------------|---------|
| HPLC report                                               | 2 to 3  |
| NMR spectra                                               | 3 to 15 |
| TG-DTA analysis                                           | 16      |
| Single crystal analysis of 5 (11 <i>R</i> , 12 <i>S</i> ) | 17-22   |
| Single crystal analysis of 5 (Racemic)                    | 23-28   |
| Single crystal analysis of 7                              | 29-34   |

## HPLC Report

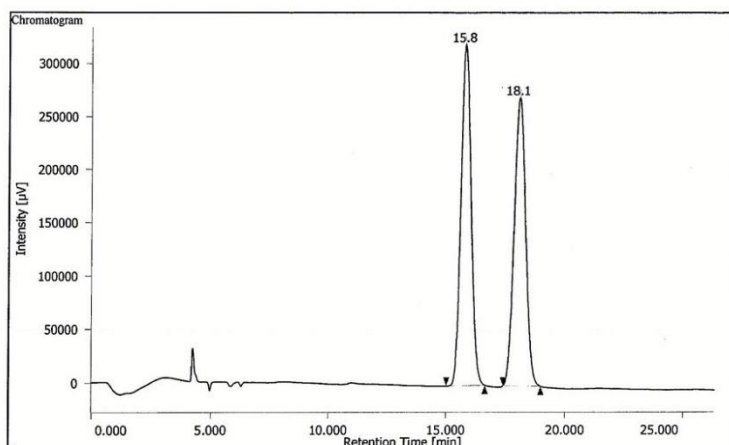

| Peak Information |           |    |          |               |             |        |      |            |                 |
|------------------|-----------|----|----------|---------------|-------------|--------|------|------------|-----------------|
| #                | Peak Name | CH | tR [min] | Area [μV-sec] | Height [μV] | Area%  | NTP  | Resolution | Symmetry Factor |
| 1                | Unknown   | 1  | 15.800   | 9488023       | 320759      | 51.179 | 6482 | 2.704      | 1.123           |
| 2                | Unknown   | 1  | 18.058   | 9050729       | 270924      | 48.821 | 6588 | N/A        | 1.105           |

Figure: HPLC graph of Racemic 5

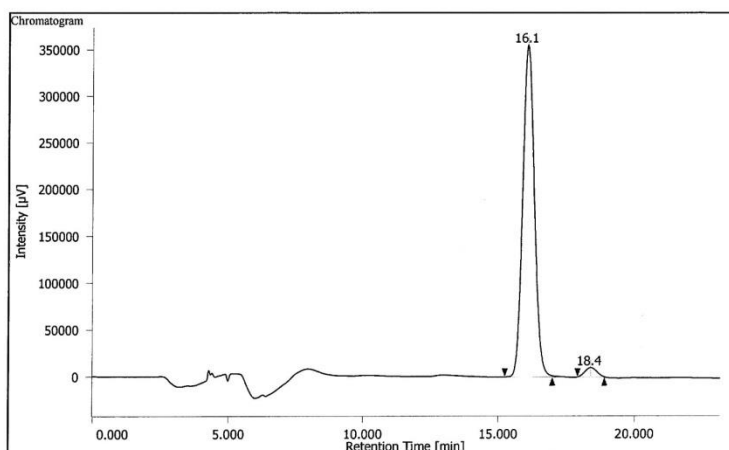

| Peak Information |           |    |          |               |             |        |      |            |                 |
|------------------|-----------|----|----------|---------------|-------------|--------|------|------------|-----------------|
| #                | Peak Name | CH | tR [min] | Area [μV-sec] | Height [μV] | Area%  | NTP  | Resolution | Symmetry Factor |
| 1                | Unknown   | 1  | 16.075   | 10709431      | 355340      | 97.325 | 6528 | 2.882      | 1.131           |
| 2                | Unknown   | 1  | 18.400   | 294359        | 9934        | 2.675  | 8014 | N/A        | 1.011           |

Figure: HPLC graph of Chiral 5

## HPLC REPORT

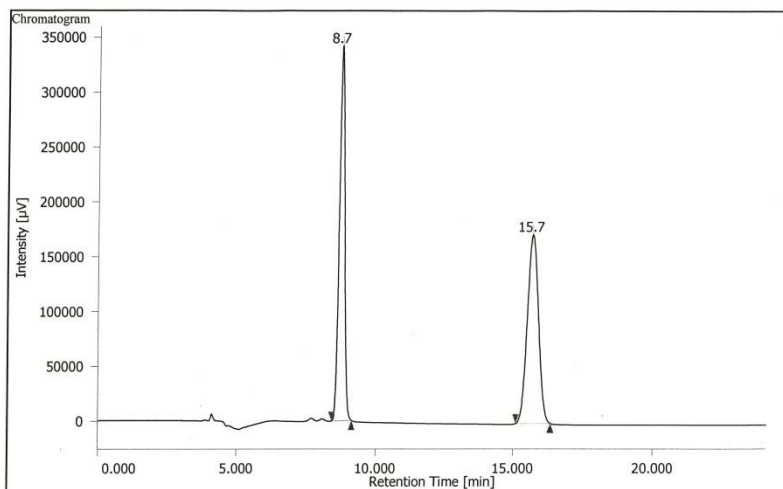

| Peak Information |           |    |          |               |             |        |      |            |                 |
|------------------|-----------|----|----------|---------------|-------------|--------|------|------------|-----------------|
| #                | Peak Name | CH | tR [min] | Area [µV·sec] | Height [µV] | Area%  | NTP  | Resolution | Symmetry Factor |
| 1                | Unknown   | 1  | 8.742    | 4698441       | 341851      | 49.370 | 9203 | 12.533     | 1.063           |
| 2                | Unknown   | 1  | 15.683   | 4818351       | 172688      | 50.630 | 7067 | N/A        | 1.063           |

**Figure: HPLC graph of Racemic 9**

## HPLC REPORT

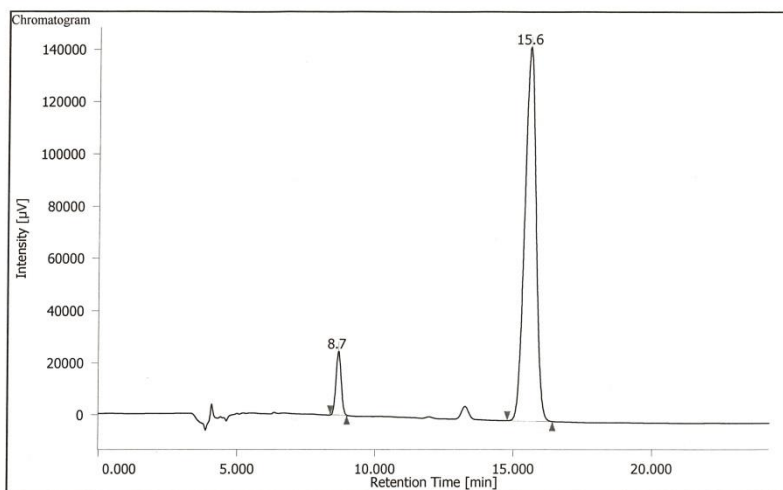

| Peak Information |           |    |          |               |             |        |      |            |                 |
|------------------|-----------|----|----------|---------------|-------------|--------|------|------------|-----------------|
| #                | Peak Name | CH | tR [min] | Area [µV·sec] | Height [µV] | Area%  | NTP  | Resolution | Symmetry Factor |
| 1                | Unknown   | 1  | 8.650    | 326690        | 24528       | 7.502  | 9502 | 12.560     | 1.040           |
| 2                | Unknown   | 1  | 15.550   | 4027862       | 143439      | 92.498 | 6939 | N/A        | 1.047           |

**Figure: HPLC graph of Chiral 9**

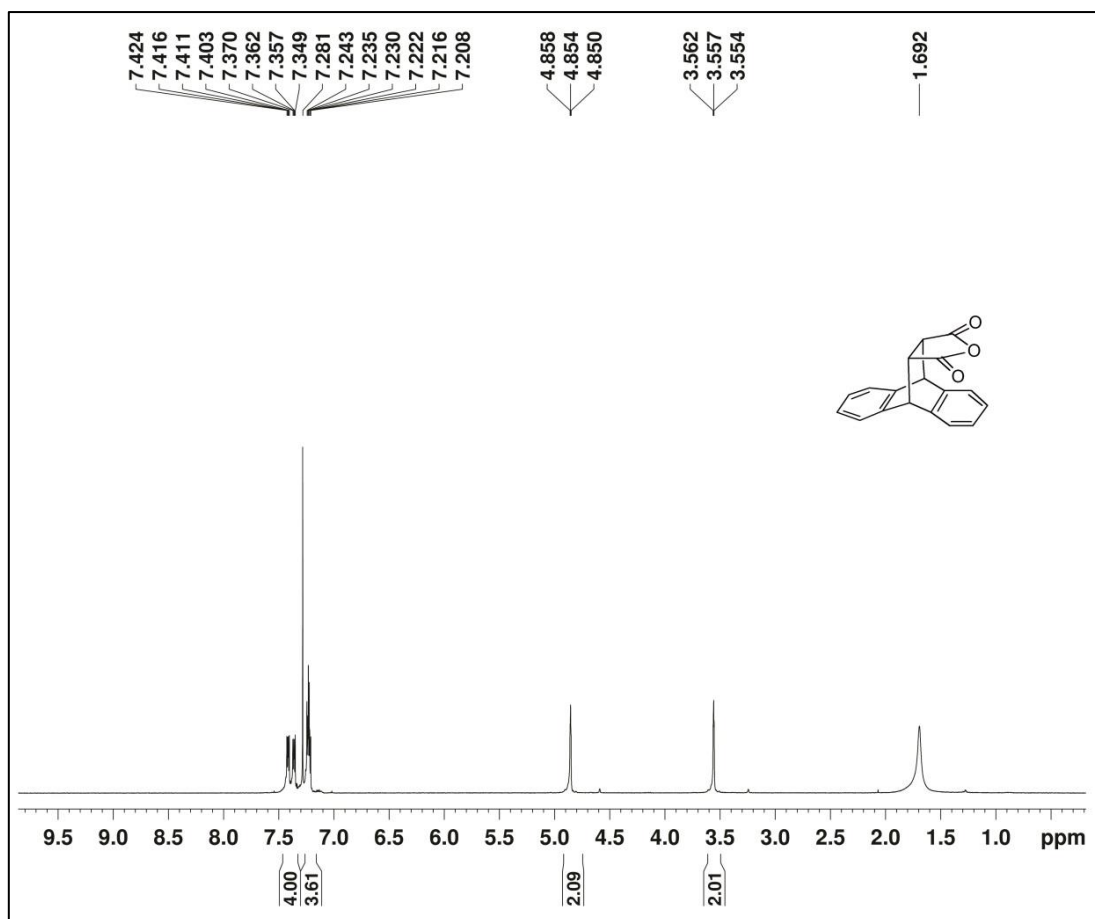

<sup>1</sup>H NMR spectra of compound 4

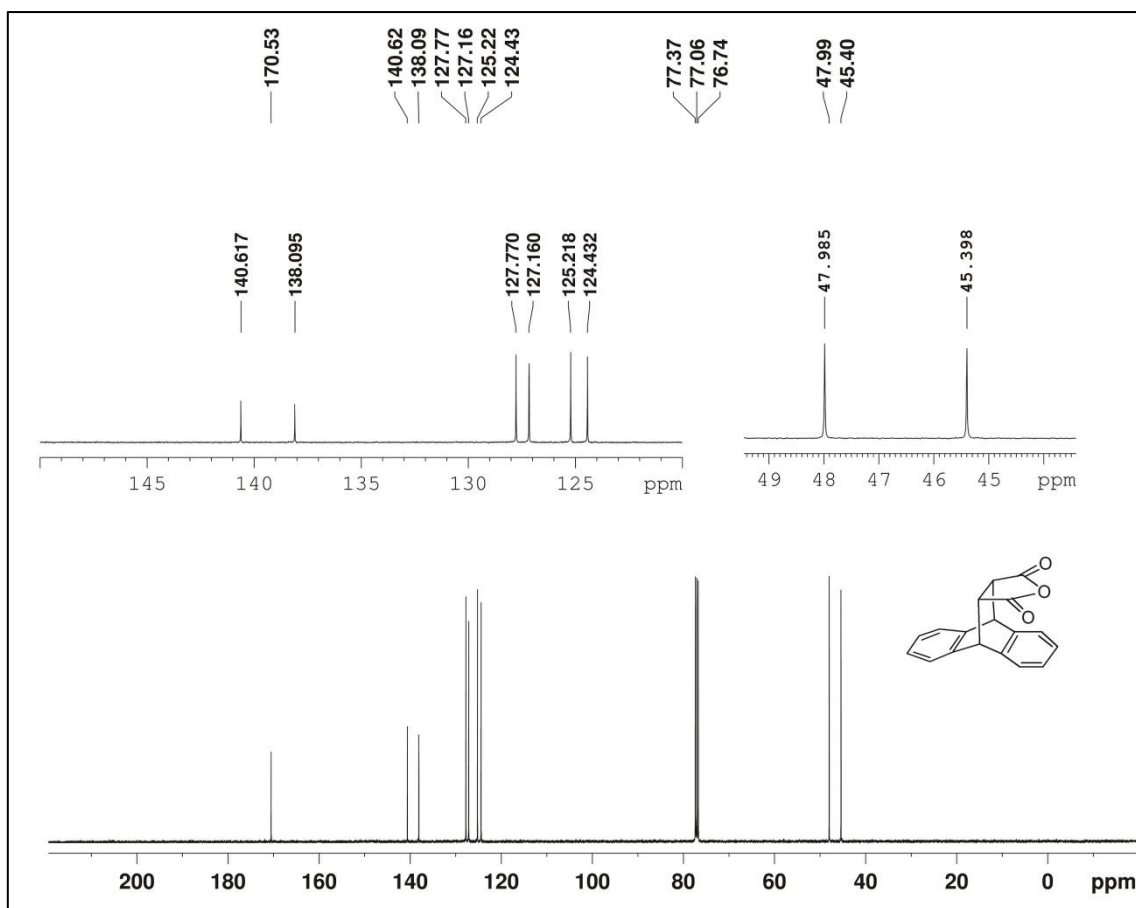

$^{13}\text{C}$  NMR spectra of compound 4

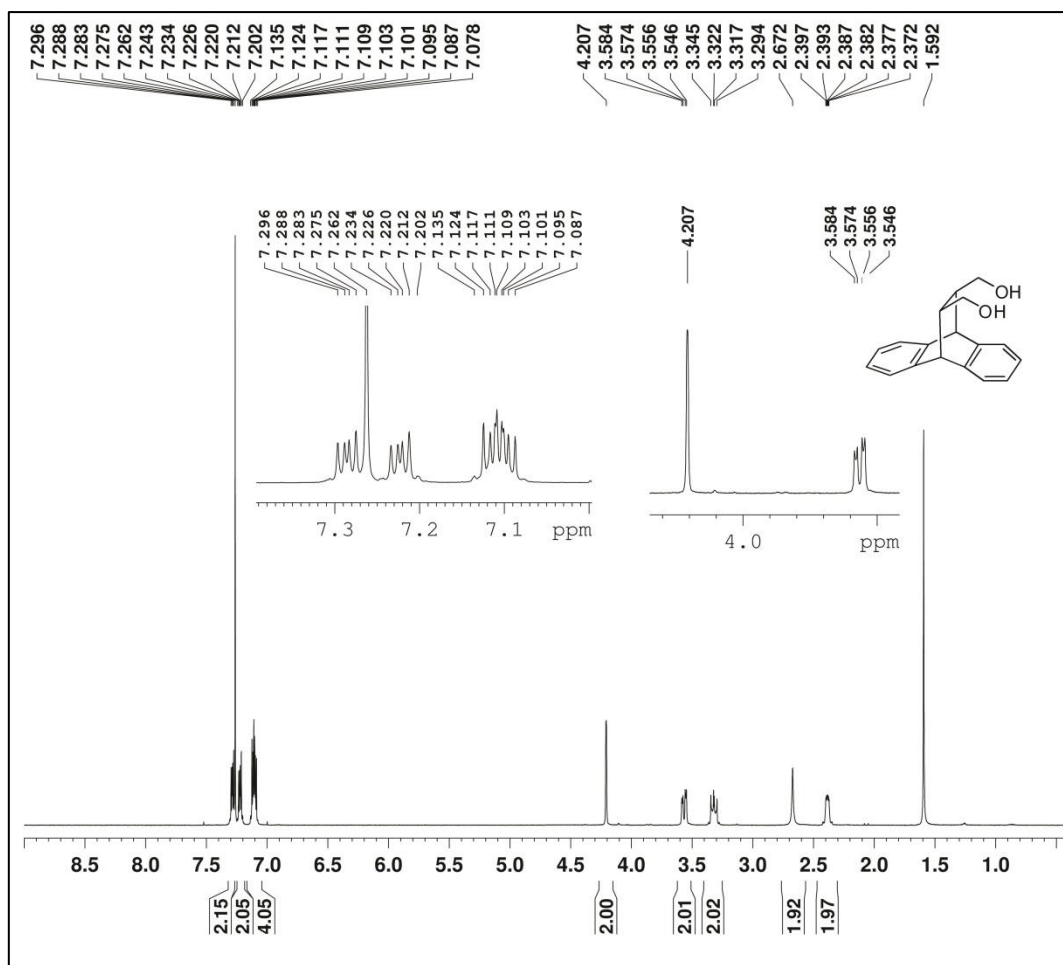

**<sup>1</sup>H NMR spectra of compound 3**

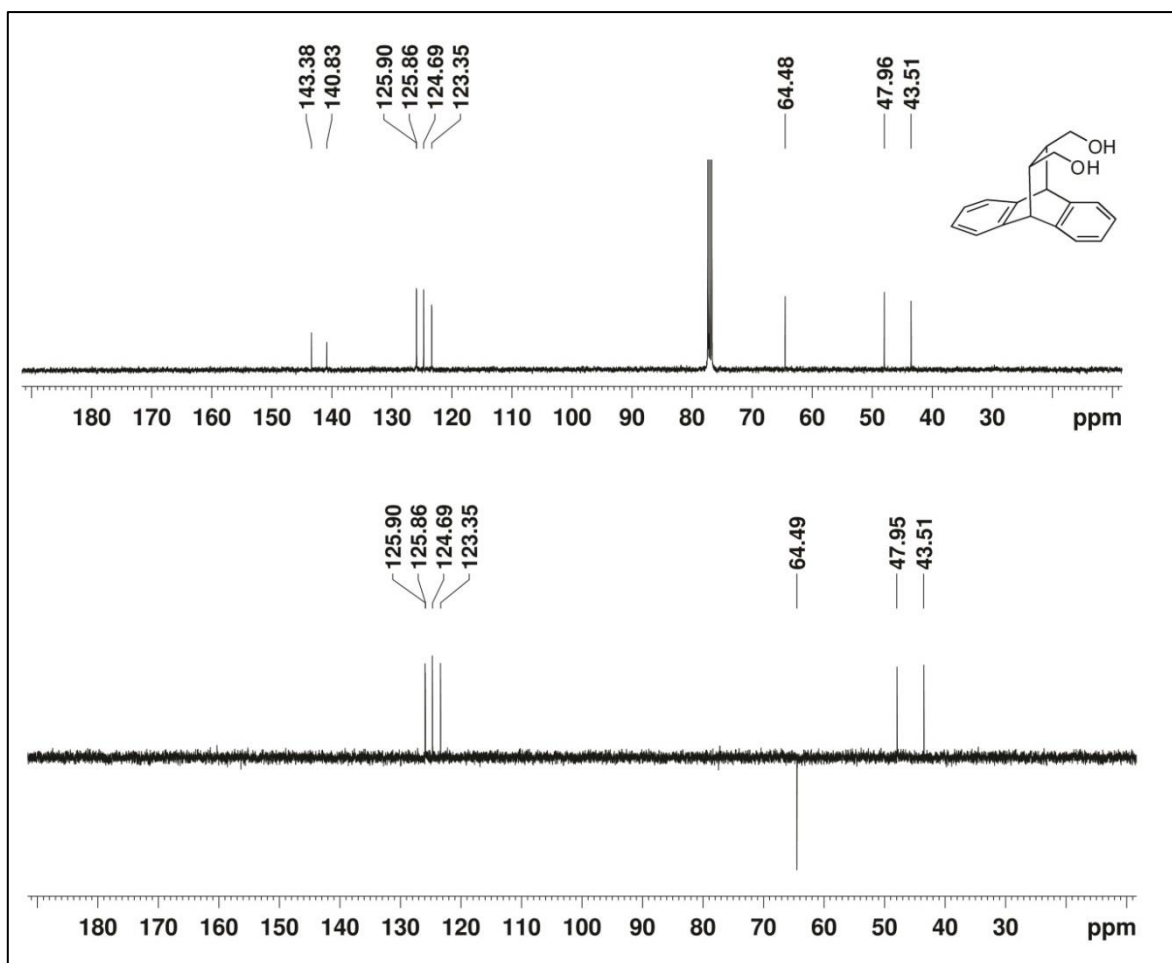

$^{13}\text{C}$  NMR & DEPT-135 spectra of compound 3

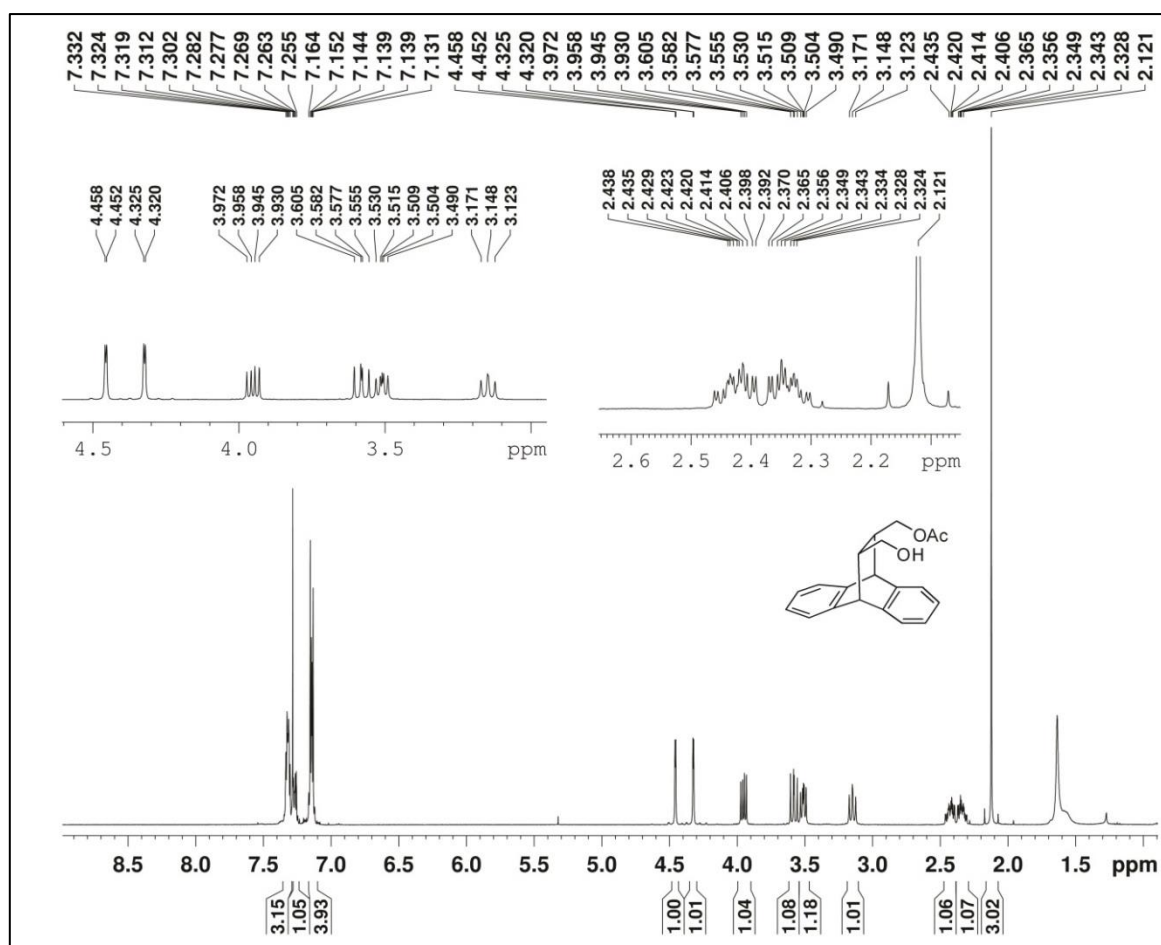

<sup>1</sup>H NMR spectra of compound 5



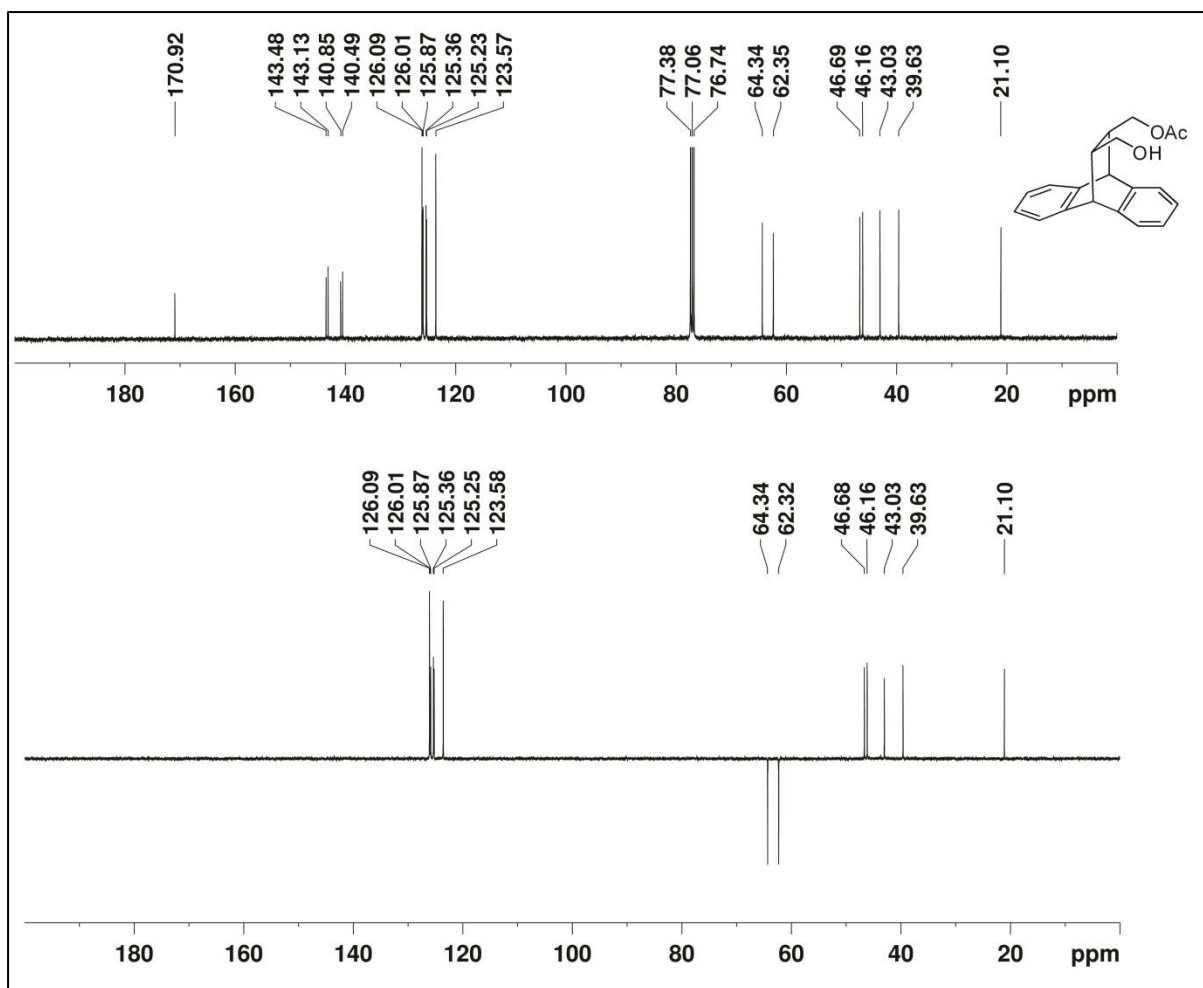

$^{13}\text{C}$  NMR & DEPT-135 spectra of compound 5

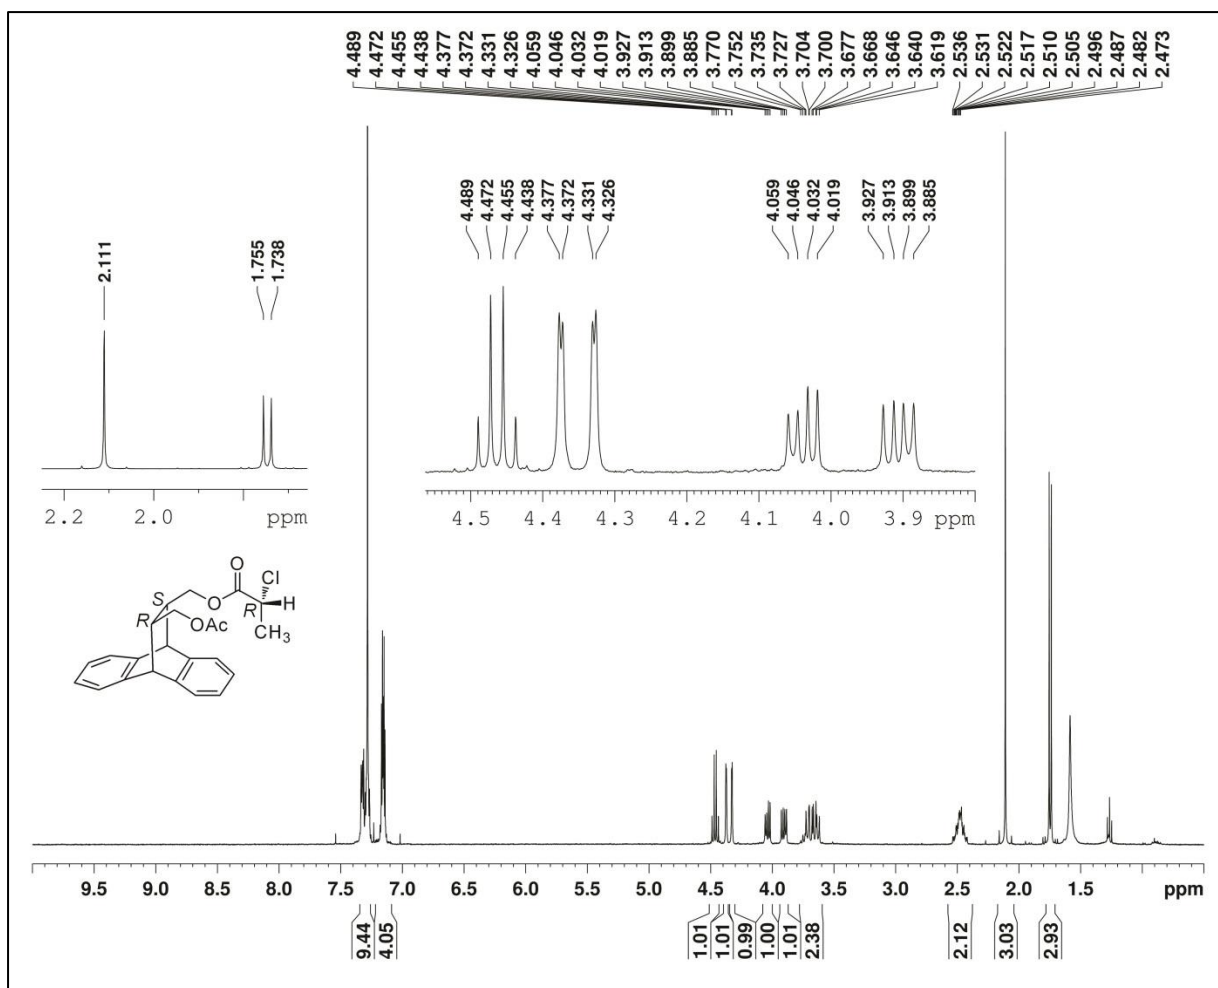

<sup>1</sup>H NMR spectra of compound 7

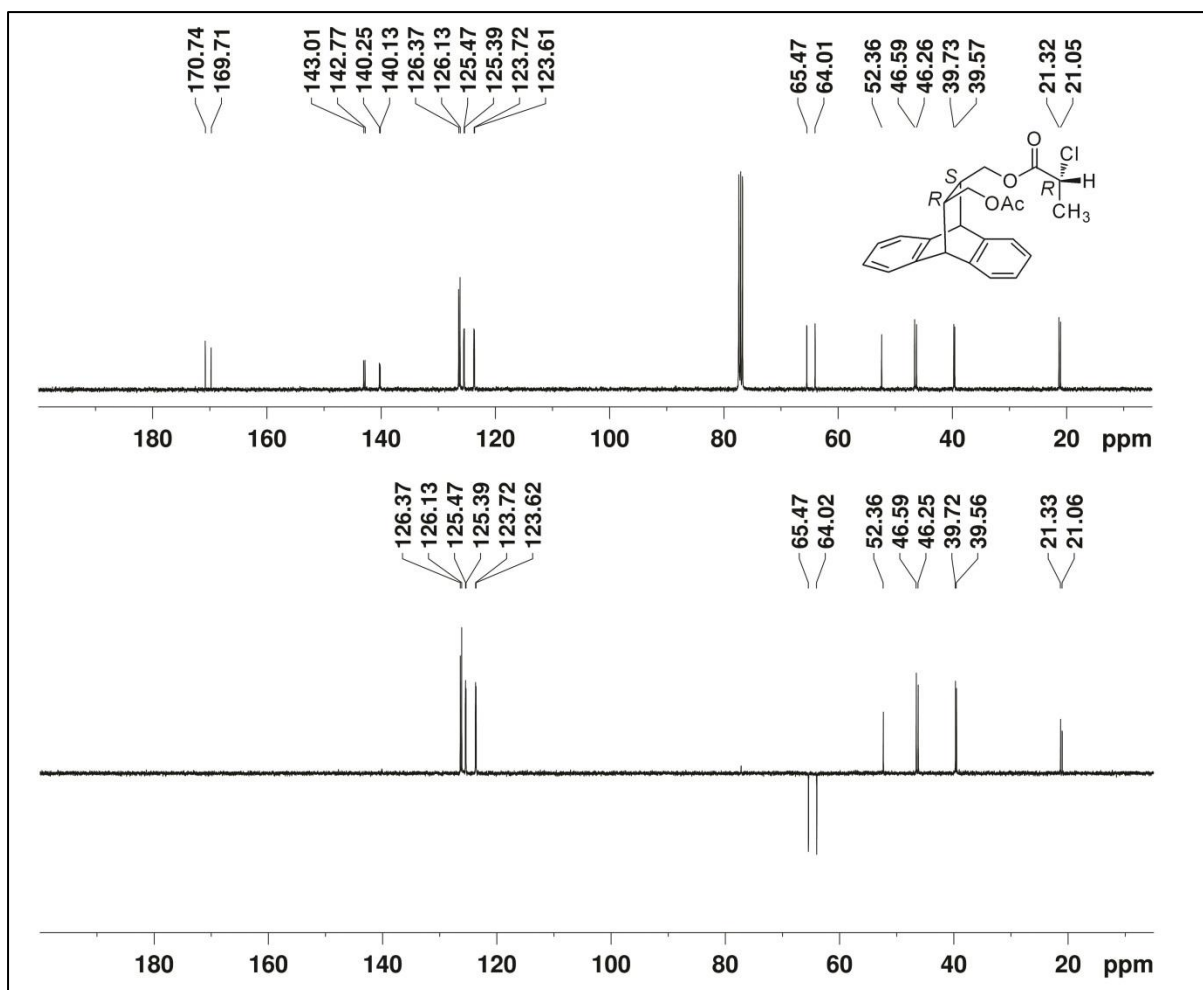

**<sup>13</sup>C NMR & DEPT-135 spectra of compound 7**

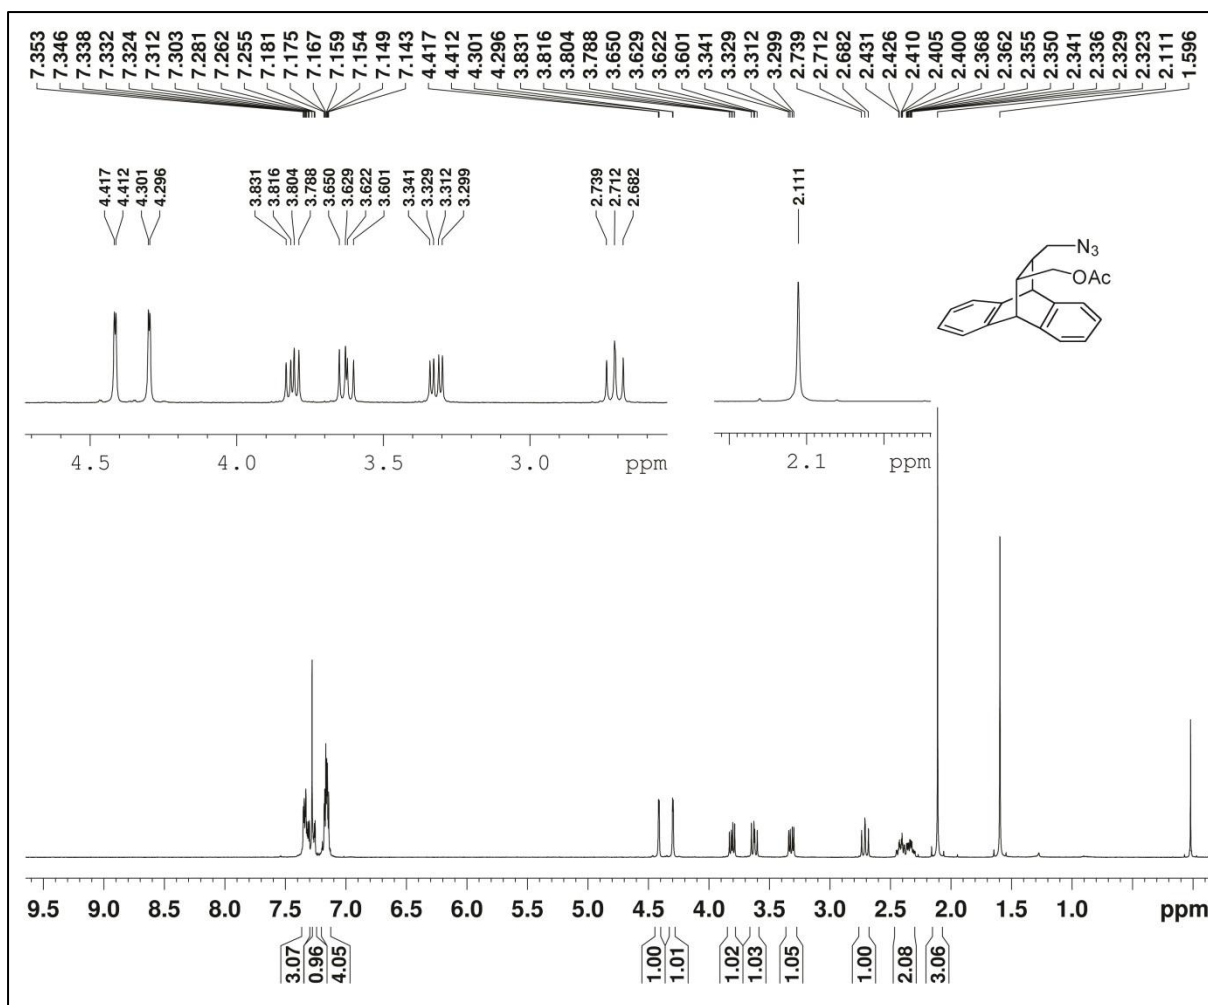

**<sup>1</sup>H NMR spectra of compound 8**

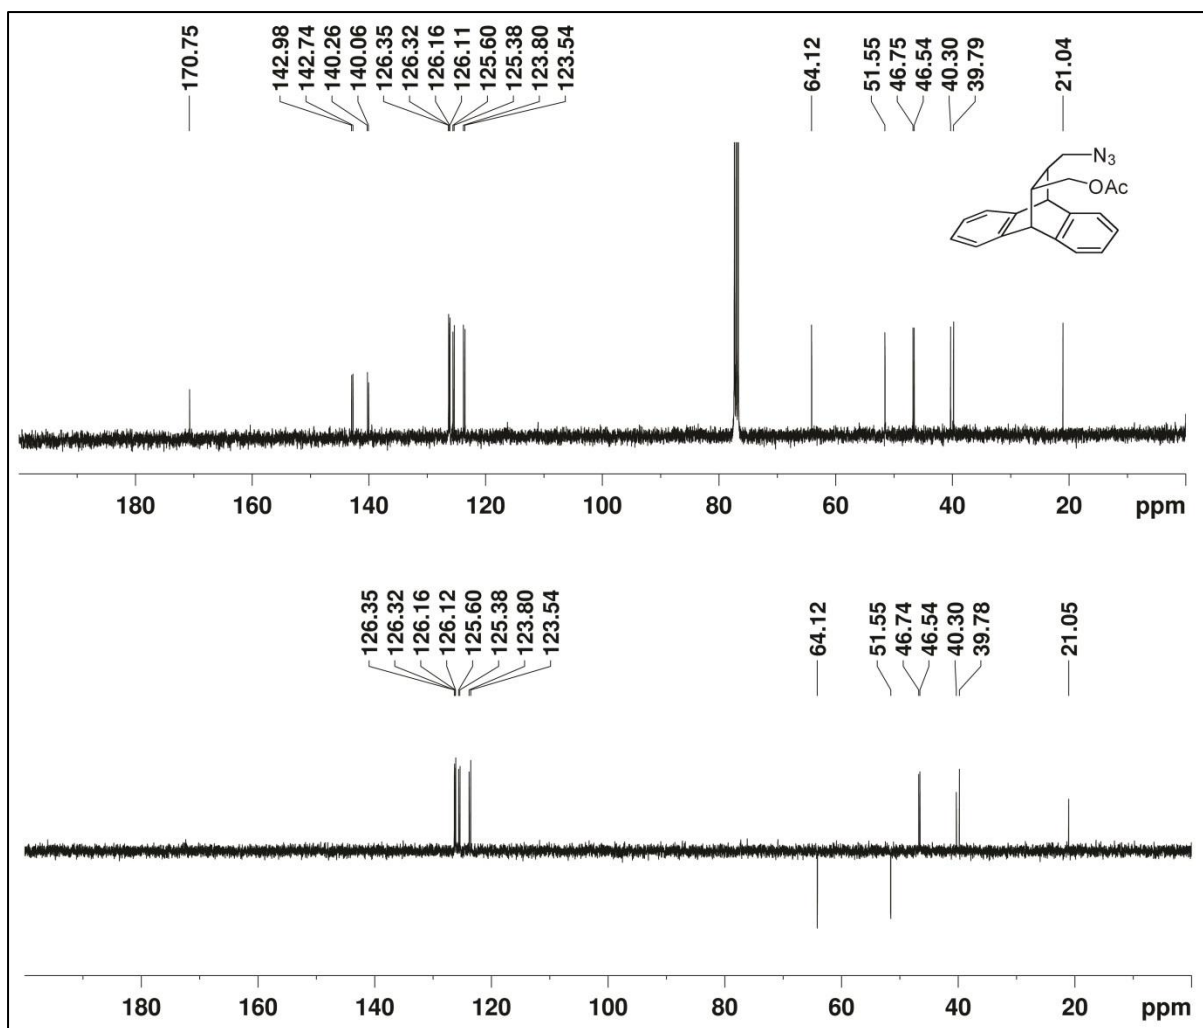

$^{13}\text{C}$  NMR & DEPT-135 spectra of compound 8

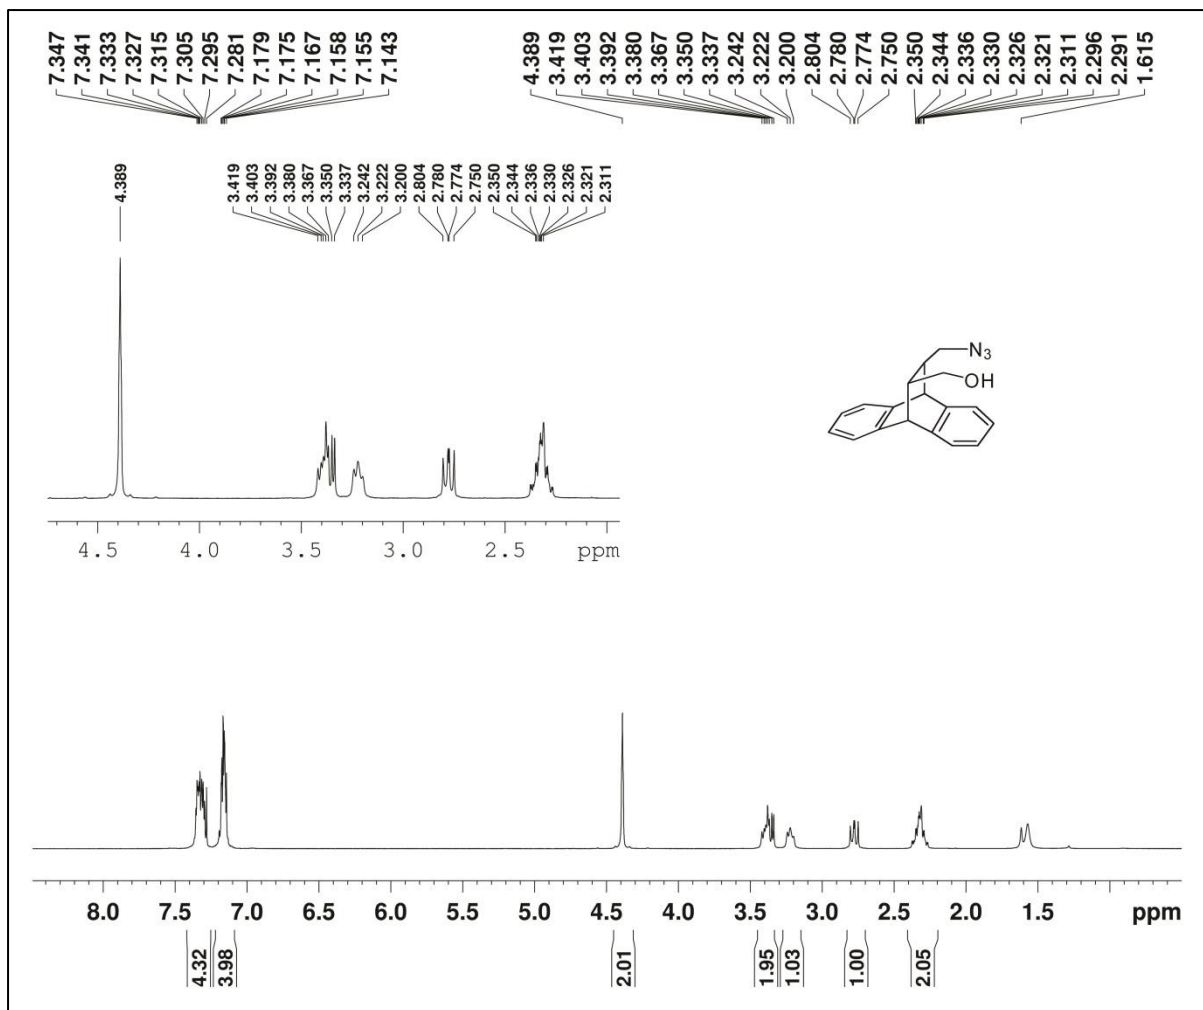

**<sup>1</sup>H NMR spectra of compound 9**

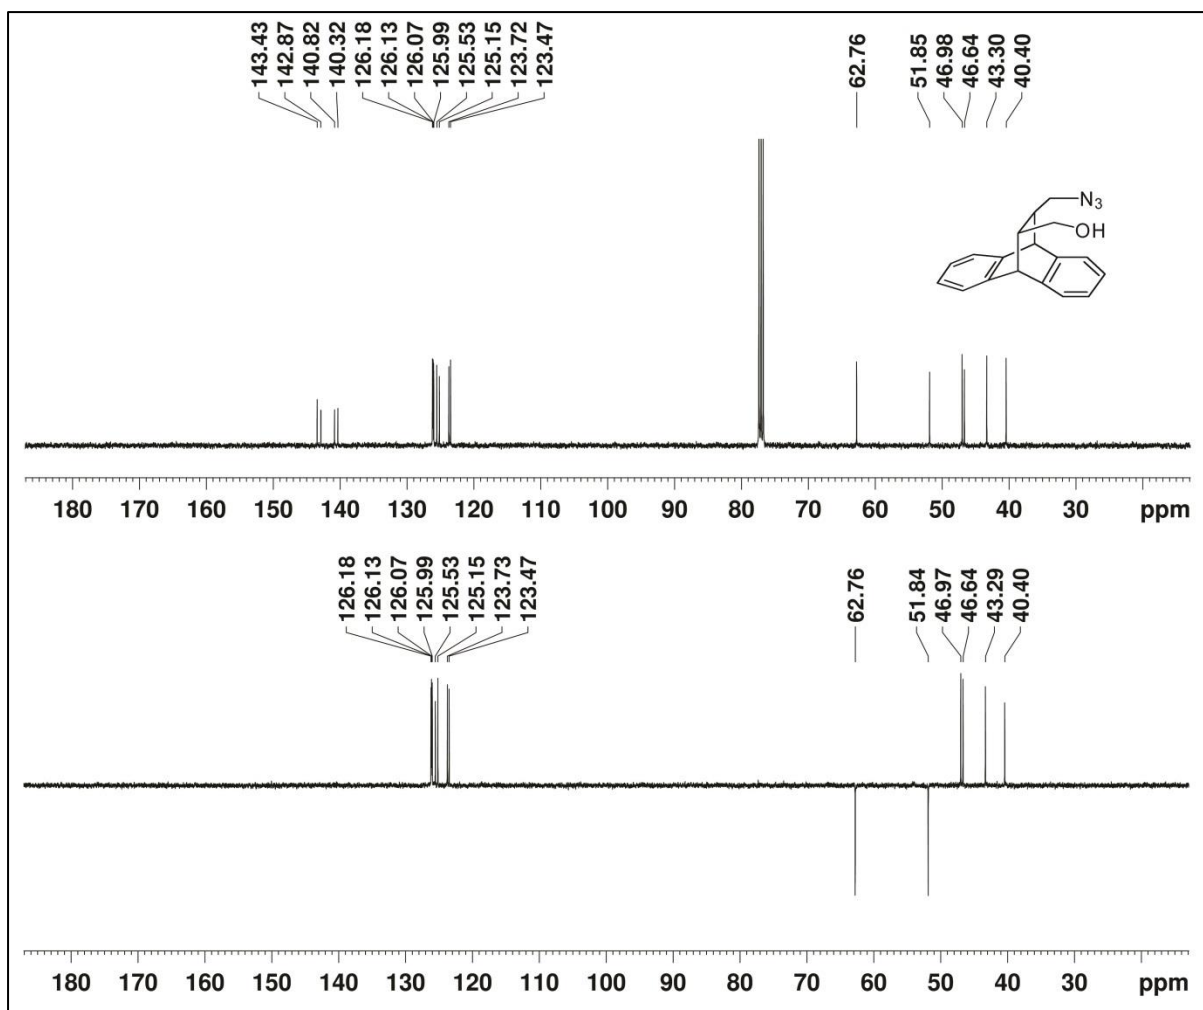

$^{13}\text{C}$  NMR & DEPT-135 spectra of compound 9

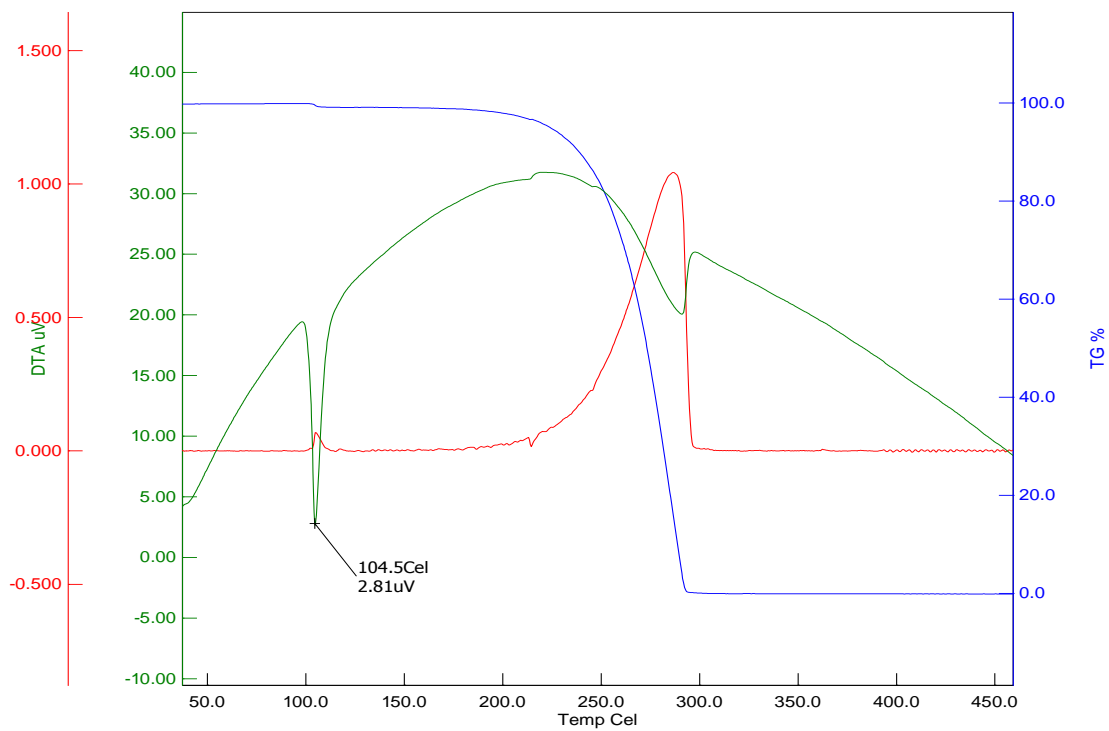

**Figure TG-DTA analysis of Chiral crystal 5**

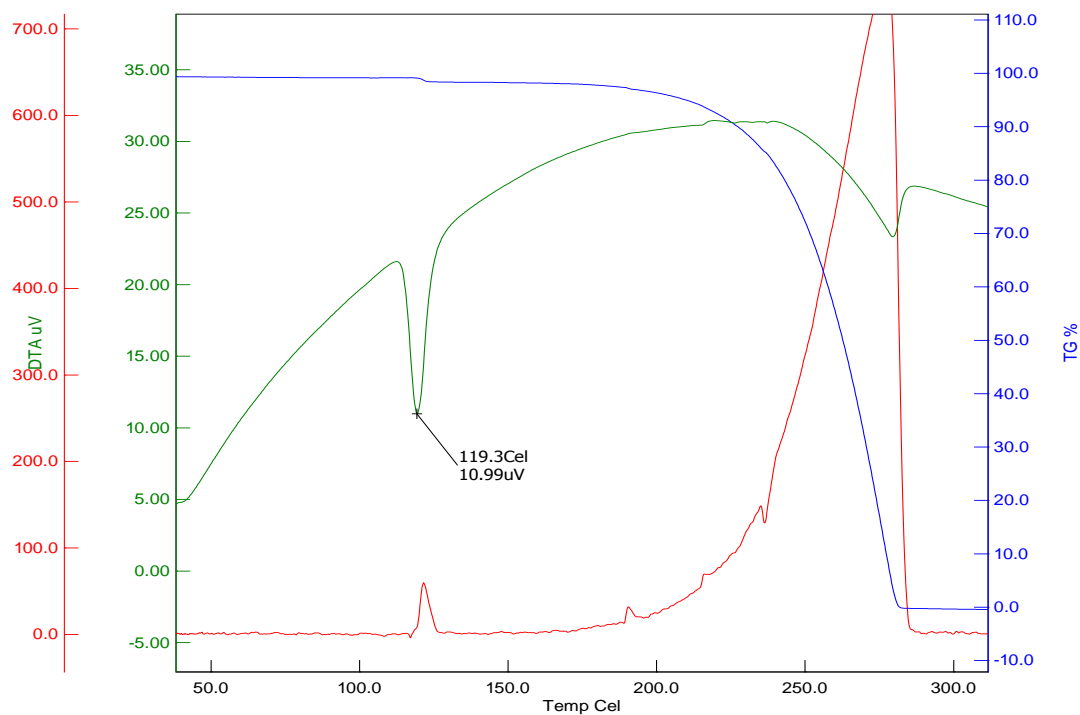

**Figure TG-DTA analysis of Racemic Crystal 5**



Crystal Data for Chiral 5 CCDC number = 1020854

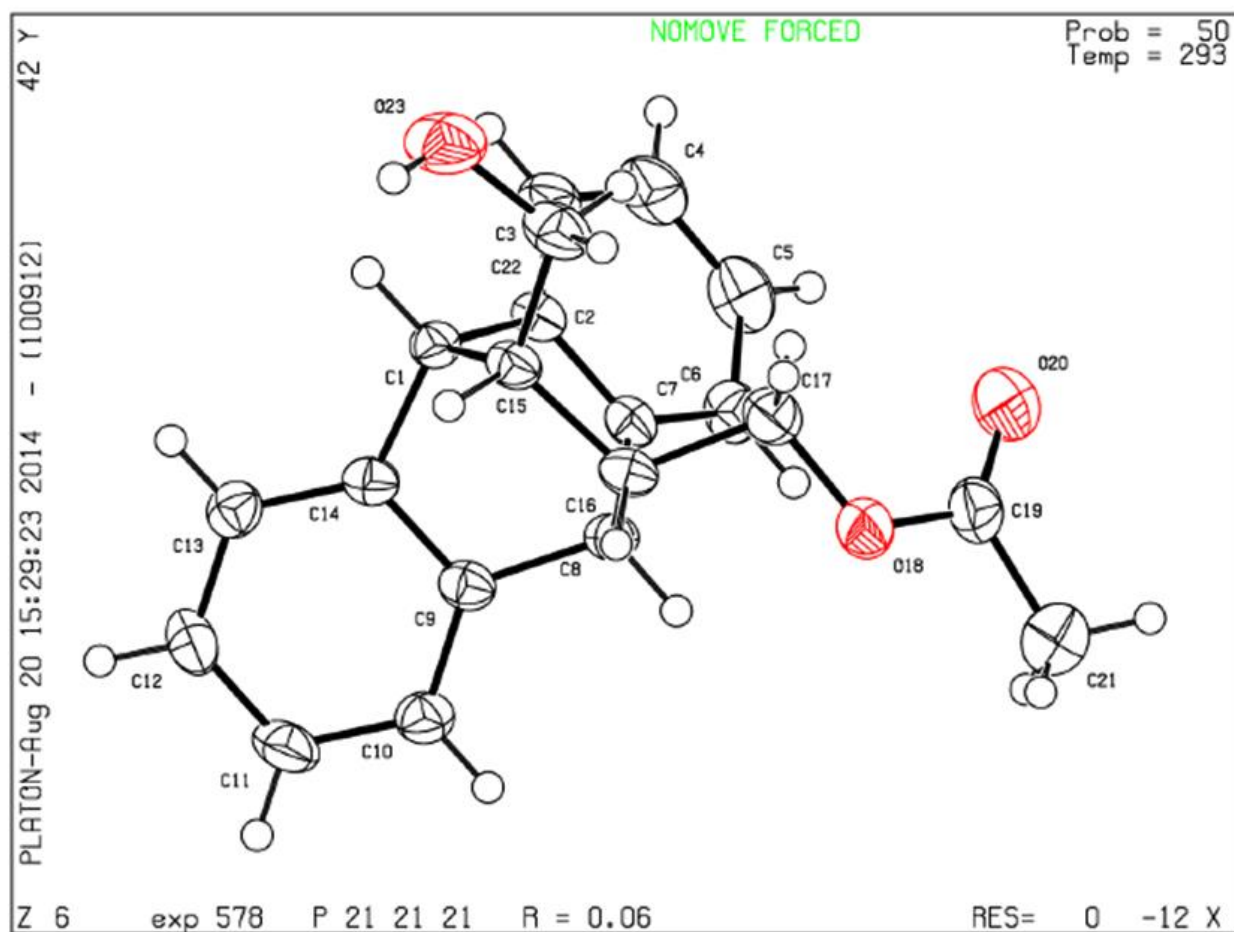

**Table 1 Crystal data and structure refinement for 5**

|                                             |                                                   |
|---------------------------------------------|---------------------------------------------------|
| Identification code                         | exp_578                                           |
| Empirical formula                           | C <sub>20</sub> H <sub>20</sub> O <sub>3</sub>    |
| Formula weight                              | 308.36                                            |
| Temperature/K                               | 293(2)                                            |
| Crystal system                              | Orthorhombic                                      |
| Space group                                 | P2 <sub>1</sub> 2 <sub>1</sub> 2 <sub>1</sub>     |
| a/Å                                         | 7.35270(18)                                       |
| b/Å                                         | 13.6016(4)                                        |
| c/Å                                         | 15.7824(4)                                        |
| α/°                                         | 90.00                                             |
| β/°                                         | 90.00                                             |
| γ/°                                         | 90.00                                             |
| Volume/Å <sup>3</sup>                       | 1578.37(7)                                        |
| Z                                           | 4                                                 |
| ρ <sub>calc</sub> /mg/mm <sup>3</sup>       | 1.298                                             |
| μ/mm <sup>-1</sup>                          | 0.690                                             |
| F(000)                                      | 656.0                                             |
| 2θ range for data collection                | 8.58 to 150.82°                                   |
| Index ranges                                | -9 ≤ h ≤ 9, -17 ≤ k ≤ 11, -19 ≤ l ≤ 18            |
| Reflections collected                       | 8107                                              |
| Independent reflections                     | 3085[R(int) = 0.0552]                             |
| Data/restraints/parameters                  | 3085/0/210                                        |
| Goodness-of-fit on F <sup>2</sup>           | 1.075                                             |
| Final R indexes [I ≥ 2σ(I)]                 | R <sub>1</sub> = 0.0698, wR <sub>2</sub> = 0.1900 |
| Final R indexes [all data]                  | R <sub>1</sub> = 0.0708, wR <sub>2</sub> = 0.1924 |
| Largest diff. peak/hole / e Å <sup>-3</sup> | 0.29/-0.53                                        |
| Flack parameter                             | 0.0(4)                                            |

**Table 2 Fractional Atomic Coordinates ( $\times 10^4$ ) and Equivalent Isotropic Displacement Parameters ( $\text{\AA}^2 \times 10^3$ ) for exp\_578.  $U_{eq}$  is defined as 1/3 of the trace of the orthogonalised  $U_{ij}$  tensor.**

| Atom | <i>X</i> | <i>y</i>    | <i>z</i>    | $U_{eq}$  |
|------|----------|-------------|-------------|-----------|
| O18  | 8730 (3) | 3257.2 (14) | 7295.0 (12) | 40.9 (5)  |
| O23  | 5148 (4) | 6213.4 (15) | 9254.3 (13) | 54.1 (6)  |
| O20  | 8841 (4) | 3981.8 (18) | 6023.9 (13) | 55.6 (6)  |
| C9   | 3485 (3) | 2758.6 (17) | 8330.0 (14) | 27.0 (5)  |
| C12  | 638 (4)  | 2384 (2)    | 9439.9 (16) | 37.3 (6)  |
| C2   | 3271 (3) | 4594.8 (16) | 7498.2 (14) | 27.1 (5)  |
| C14  | 2518 (3) | 3536.9 (16) | 8702.8 (14) | 25.5 (5)  |
| C1   | 3274 (3) | 4532.8 (16) | 8455.9 (14) | 26.4 (5)  |
| C10  | 3043 (4) | 1799.5 (17) | 8530.8 (15) | 31.8 (5)  |
| C13  | 1107 (3) | 3346.8 (18) | 9252.3 (14) | 30.3 (5)  |
| C3   | 2552 (3) | 5349.5 (19) | 7009.8 (17) | 35.1 (6)  |
| C8   | 4959 (3) | 3090.2 (16) | 7732.5 (13) | 26.5 (5)  |
| C7   | 4135 (3) | 3802.4 (17) | 7110.3 (14) | 26.0 (5)  |
| C19  | 9124 (4) | 3284 (2)    | 6473.1 (18) | 39.3 (6)  |
| C15  | 5299 (3) | 4521.1 (16) | 8759.4 (14) | 26.9 (5)  |
| C22  | 6146 (4) | 5542.6 (19) | 8753.0 (16) | 39.7 (6)  |
| C17  | 7858 (3) | 4098.6 (19) | 7682.2 (17) | 35.1 (6)  |
| C11  | 1602 (4) | 1607.9 (19) | 9085.9 (17) | 39.2 (6)  |
| C16  | 6356 (3) | 3705.2 (16) | 8260.2 (14) | 27.8 (5)  |
| C6   | 4250 (4) | 3753 (2)    | 6234.3 (15) | 34.7 (5)  |
| C4   | 2690 (4) | 5293 (2)    | 6132.9 (19) | 45.0 (7)  |
| C5   | 3516 (4) | 4507 (2)    | 5754.3 (16) | 44.6 (7)  |
| C21  | 9959 (6) | 2334 (3)    | 6195 (3)    | 67.8 (10) |

**Table 3 Anisotropic Displacement Parameters ( $\text{\AA}^2 \times 10^3$ ) for exp\_578. The Anisotropic displacement factor exponent takes the form:  $-2\pi^2[h^2a^*U_{11}+\dots+2hka \times b \times U_{12}]$**

| Atom | $U_{11}$  | $U_{22}$  | $U_{33}$  | $U_{23}$ | $U_{13}$  | $U_{12}$  |
|------|-----------|-----------|-----------|----------|-----------|-----------|
| O18  | 41.1 (9)  | 40.1 (10) | 41.6 (10) | 10.8 (8) | 9.8 (8)   | 7.5 (8)   |
| O23  | 84.8 (16) | 33.9 (10) | 43.6 (10) | -6.9 (8) | -1.0 (12) | -5.6 (11) |
| O20  | 68.9 (14) | 56.8 (13) | 41.2 (11) | 9.5 (10) | 12.0 (11) | 3.8 (13)  |
| C9   | 33 (1)    | 24 (1)    | 24.0 (9)  | 1.6 (8)  | -3.3 (9)  | -1.5 (9)  |
| C12  | 37.9 (12) | 42.4 (14) | 31.7 (11) | 1.9 (11) | 9.2 (10)  | -9.7 (11) |
| C2   | 30.8 (9)  | 23.3 (10) | 27.3 (11) | 3.6 (8)  | -0.4 (9)  | -2.9 (9)  |
| C14  | 31.3 (10) | 23 (1)    | 22.1 (10) | 0.5 (8)  | -3.5 (8)  | -0.6 (9)  |
| C1   | 34.6 (11) | 21.2 (10) | 23.3 (10) | -0.8 (8) | 3.5 (9)   | 1.1 (8)   |
| C10  | 39.3 (11) | 25.0 (11) | 31.3 (11) | -3.0 (9) | 1.1 (10)  | -1.5 (9)  |
| C13  | 34.8 (11) | 32.0 (11) | 24 (1)    | -2.5 (9) | -0.2 (9)  | 2.7 (10)  |

|     |           |           |           |           |           |            |
|-----|-----------|-----------|-----------|-----------|-----------|------------|
| C3  | 35.5 (11) | 29.1 (11) | 40.7 (13) | 9.5 (10)  | -0.9 (11) | 2.4 (10)   |
| C8  | 32.9 (10) | 21 (1)    | 25.5 (10) | 0.4 (8)   | -0.3 (9)  | 0.0 (9)    |
| C7  | 29.9 (10) | 26.2 (10) | 21.9 (10) | 3.3 (8)   | 0.3 (9)   | -3.1 (9)   |
| C19 | 35.2 (11) | 41.3 (14) | 41.4 (14) | -0.1 (11) | 9.6 (11)  | -5.0 (11)  |
| C15 | 36.9 (11) | 22.6 (10) | 21.3 (9)  | 1.5 (8)   | -0.3 (9)  | -3.2 (9)   |
| C22 | 53.4 (14) | 31.2 (12) | 34.7 (12) | -0.5 (10) | -0.7 (12) | -12.9 (12) |
| C17 | 33.1 (11) | 33.4 (12) | 38.9 (13) | 4.7 (10)  | 1.2 (11)  | -1.5 (10)  |
| C11 | 54.8 (15) | 24.5 (11) | 38.2 (13) | 2.3 (10)  | 2.5 (12)  | -10.4 (11) |
| C16 | 32.6 (10) | 23.9 (10) | 27 (1)    | 5.5 (9)   | -4.6 (9)  | 0.0 (9)    |
| C6  | 41.8 (12) | 38.9 (13) | 23.5 (11) | -1.1 (10) | 1.8 (10)  | -4.0 (11)  |
| C4  | 44.8 (13) | 53.6 (17) | 36.5 (13) | 22.1 (12) | -7.1 (12) | 2.6 (14)   |
| C5  | 50.3 (14) | 60.0 (17) | 23.4 (11) | 7.4 (12)  | -4.9 (11) | -4.9 (14)  |
| C21 | 77 (2)    | 51.0 (19) | 75 (2)    | -1.5 (17) | 31 (2)    | 5 (2)      |

**Table 4 Bond Lengths for exp\_578.**

| <b>Atom</b> | <b>Atom</b> | <b>Length/Å</b> | <b>Atom</b> | <b>Atom</b> | <b>Length/Å</b> |
|-------------|-------------|-----------------|-------------|-------------|-----------------|
| O18         | C19         | 1.330 (3)       | C14         | C13         | 1.377 (3)       |
| O18         | C17         | 1.447 (3)       | C1          | C15         | 1.564 (3)       |
| O23         | C22         | 1.413 (4)       | C10         | C11         | 1.399 (4)       |
| O20         | C19         | 1.203 (4)       | C3          | C4          | 1.390 (4)       |
| C9          | C14         | 1.405 (3)       | C8          | C7          | 1.507 (3)       |
| C9          | C10         | 1.381 (3)       | C8          | C16         | 1.564 (3)       |
| C9          | C8          | 1.506 (3)       | C7          | C6          | 1.387 (3)       |
| C12         | C13         | 1.386 (4)       | C19         | C21         | 1.497 (4)       |
| C12         | C11         | 1.389 (4)       | C15         | C22         | 1.523 (3)       |
| C2          | C1          | 1.514 (3)       | C15         | C16         | 1.567 (3)       |
| C2          | C3          | 1.388 (3)       | C17         | C16         | 1.529 (3)       |
| C2          | C7          | 1.393 (3)       | C6          | C5          | 1.385 (4)       |
| C14         | C1          | 1.515 (3)       | C4          | C5          | 1.367 (5)       |

| Atom | Atom | Atom | Angle/°     | Atom | Atom | Atom |
|------|------|------|-------------|------|------|------|
| C19  | O18  | C17  | 119.1 (2)   | C7   | C8   | C16  |
| C14  | C9   | C8   | 113.65 (19) | C2   | C7   | C8   |
| C10  | C9   | C14  | 119.8 (2)   | C6   | C7   | C2   |
| C10  | C9   | C8   | 126.6 (2)   | C6   | C7   | C8   |
| C13  | C12  | C11  | 120.3 (2)   | O18  | C19  | C21  |
| C3   | C2   | C1   | 126.6 (2)   | O20  | C19  | O18  |
| C3   | C2   | C7   | 120.1 (2)   | O20  | C19  | C21  |
| C7   | C2   | C1   | 113.27 (19) | C1   | C15  | C16  |
| C9   | C14  | C1   | 112.34 (19) | C22  | C15  | C1   |
| C13  | C14  | C9   | 120.3 (2)   | C22  | C15  | C16  |
| C13  | C14  | C1   | 127.3 (2)   | O23  | C22  | C15  |
| C2   | C1   | C14  | 107.81 (18) | O18  | C17  | C16  |
| C2   | C1   | C15  | 107.95 (17) | C12  | C11  | C10  |
| C14  | C1   | C15  | 105.16 (18) | C8   | C16  | C15  |
| C9   | C10  | C11  | 119.9 (2)   | C17  | C16  | C8   |
| C14  | C13  | C12  | 120.0 (2)   | C17  | C16  | C15  |
| C2   | C3   | C4   | 119.0 (3)   | C5   | C6   | C7   |
| C9   | C8   | C7   | 108.12 (19) | C5   | C4   | C3   |
| C9   | C8   | C16  | 107.41 (18) | C4   | C5   | C6   |

**Table 6 Hydrogen Atom Coordinates ( $\text{\AA}\times 10^4$ ) and Isotropic Displacement Parameters ( $\text{\AA}^2\times 10^3$ ) for exp\_578.**

| Atom | x     | y    | z    | U(eq) |
|------|-------|------|------|-------|
| H23  | 5157  | 6030 | 9749 | 81    |
| H12  | -328  | 2257 | 9804 | 45    |
| H1   | 2585  | 5072 | 8714 | 32    |
| H10  | 3702  | 1282 | 8298 | 38    |
| H13  | 469   | 3864 | 9498 | 36    |
| H3   | 1987  | 5884 | 7265 | 42    |
| H8   | 5542  | 2534 | 7446 | 32    |
| H15  | 5278  | 4310 | 9353 | 32    |
| H22A | 7382  | 5502 | 8965 | 48    |
| H22B | 6197  | 5783 | 8175 | 48    |
| H17A | 7344  | 4523 | 7250 | 42    |
| H17B | 8733  | 4474 | 8009 | 42    |
| H11  | 1292  | 963  | 9218 | 47    |
| H16  | 6920  | 3265 | 8675 | 33    |
| H6   | 4812  | 3221 | 5973 | 42    |
| H4   | 2215  | 5795 | 5800 | 54    |
| H5   | 3586  | 4479 | 5166 | 53    |
| H21A | 10589 | 2039 | 6663 | 102   |
| H21B | 10803 | 2457 | 5743 | 102   |
| H21C | 9022  | 1898 | 6000 | 102   |

Single crystals of  $C_{20}H_{20}O_3$ . A suitable crystal was selected and on a Gemini diffractometer. The crystal was kept at 293(2) K during data collection. Using Olex2 [1], the structure was solved with the Superflip structure solution program using Charge Flipping and refined with the ShelXL refinement package using Least Squares minimisation. **Crystal Data** for  $C_{20}H_{20}O_3$  ( $M = 308.36$ ): orthorhombic, space group  $P2_12_12_1$  (no. 19),  $a = 7.35270(18)$  Å,  $b = 13.6016(4)$  Å,  $c = 15.7824(4)$  Å,  $V = 1578.37(7)$  Å<sup>3</sup>,  $Z = 4$ ,  $T = 293(2)$  K,  $\mu(\text{Cu K}\alpha) = 0.690$  mm<sup>-1</sup>,  $D_{\text{calc}} = 1.298$  g/mm<sup>3</sup>, 8107 reflections measured ( $8.58 \leq 2\theta \leq 150.82$ ), 3085 unique ( $R_{\text{int}} = 0.0552$ ) which were used in all calculations. The final  $R_1$  was 0.0698 ( $>2\sigma(I)$ ) and  $wR_2$  was 0.1924 (all data).

Crysal data of racemic 5 CCDC No.1020855

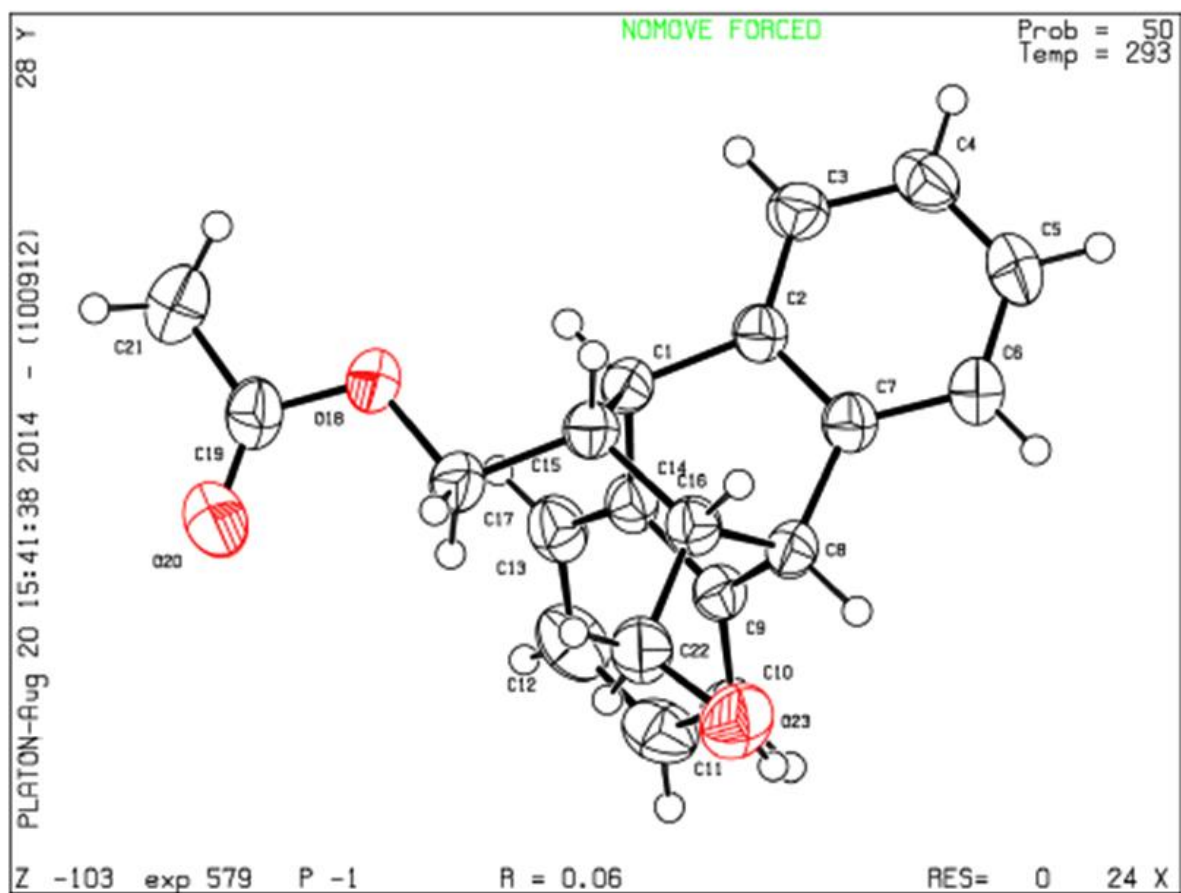

**Table 1 Crystal data and structure refinement for exp\_579**

|                                             |                                                   |
|---------------------------------------------|---------------------------------------------------|
| Identification code                         | exp_579                                           |
| Empirical formula                           | C <sub>20</sub> H <sub>20</sub> O <sub>3</sub>    |
| Formula weight                              | 308.36                                            |
| Temperature/K                               | 293(2)                                            |
| Crystal system                              | Triclinic                                         |
| Space group                                 | P-1                                               |
| a/Å                                         | 8.2328(5)                                         |
| b/Å                                         | 8.8177(4)                                         |
| c/Å                                         | 11.1343(7)                                        |
| α/°                                         | 95.635(4)                                         |
| β/°                                         | 97.037(5)                                         |
| γ/°                                         | 95.431(4)                                         |
| Volume/Å <sup>3</sup>                       | 793.65(8)                                         |
| Z                                           | 2                                                 |
| ρ <sub>calc</sub> /mg/mm <sup>3</sup>       | 1.290                                             |
| μ/mm <sup>-1</sup>                          | 0.686                                             |
| F(000)                                      | 328.0                                             |
| Crystal size/mm <sup>3</sup>                | ? × ? × ?                                         |
| 2θ range for data collection                | 10.14 to 150.68°                                  |
| Index ranges                                | -10 ≤ h ≤ 9, -6 ≤ k ≤ 11, -13 ≤ l ≤ 13            |
| Reflections collected                       | 4910                                              |
| Independent reflections                     | 3114[R(int) = 0.0212]                             |
| Data/restraints/parameters                  | 3114/0/210                                        |
| Goodness-of-fit on F <sup>2</sup>           | 1.114                                             |
| Final R indexes [I ≥ 2σ (I)]                | R <sub>1</sub> = 0.0549, wR <sub>2</sub> = 0.1525 |
| Final R indexes [all data]                  | R <sub>1</sub> = 0.0590, wR <sub>2</sub> = 0.1568 |
| Largest diff. peak/hole / e Å <sup>-3</sup> | 0.23/-0.19                                        |



**Table 2 Fractional Atomic Coordinates ( $\times 10^4$ ) and Equivalent Isotropic Displacement Parameters ( $\text{\AA}^2 \times 10^3$ ) for exp\_579.  $U_{eq}$  is defined as 1/3 of the trace of the orthogonalised  $U_{ij}$  tensor.**

| Atom | x           | y            | z            | $U_{eq}$ |
|------|-------------|--------------|--------------|----------|
| O18  | 4058.8 (16) | 6241.2 (13)  | 8524.3 (12)  | 51.9 (3) |
| C7   | 1247.2 (19) | 899.8 (17)   | 6986.7 (14)  | 38.6 (3) |
| C2   | 2249.9 (19) | 1979.3 (17)  | 6489.7 (14)  | 38.5 (3) |
| O23  | 501 (2)     | 1698.9 (17)  | 10746.0 (13) | 65.7 (4) |
| C9   | -508.8 (19) | 2853.5 (16)  | 7547.5 (13)  | 37.7 (3) |
| C3   | 3090 (2)    | 1518.2 (19)  | 5539.8 (15)  | 44.5 (4) |
| C8   | 430.6 (19)  | 1596.2 (16)  | 8022.0 (14)  | 38.5 (3) |
| C16  | 1851 (2)    | 2372.5 (16)  | 9021.1 (14)  | 39.4 (3) |
| C15  | 2916.2 (19) | 3629.7 (17)  | 8462.5 (14)  | 40.0 (3) |
| C1   | 2244.0 (19) | 3596.9 (16)  | 7082.1 (13)  | 38.4 (3) |
| C14  | 471 (2)     | 3927.2 (16)  | 7027.2 (13)  | 37.7 (3) |
| C6   | 1068 (2)    | -627.8 (17)  | 6518.1 (15)  | 44.9 (4) |
| O20  | 3243 (2)    | 8262.1 (17)  | 9563.2 (17)  | 84.8 (6) |
| C10  | -2159 (2)   | 3010 (2)     | 7580.4 (15)  | 46.3 (4) |
| C13  | -207 (2)    | 5150.3 (18)  | 6551.3 (15)  | 47.7 (4) |
| C11  | -2831 (2)   | 4229 (2)     | 7086.4 (17)  | 56.1 (5) |
| C4   | 2889 (2)    | -17 (2)      | 5061.7 (16)  | 49.5 (4) |
| C5   | 1887 (2)    | -1080.0 (19) | 5543.1 (16)  | 49.7 (4) |
| C17  | 2966 (2)    | 5241.1 (18)  | 9108.9 (16)  | 46.7 (4) |
| C22  | 1184 (2)    | 2938.4 (19)  | 10181.5 (15) | 49.0 (4) |
| C12  | -1861 (3)   | 5290 (2)     | 6574.6 (17)  | 57.4 (5) |
| C19  | 4061 (2)    | 7749.2 (19)  | 8825.1 (17)  | 51.7 (4) |
| C21  | 5176 (3)    | 8679 (2)     | 8155 (2)     | 62.2 (5) |

**Table 3 Anisotropic Displacement Parameters ( $\text{\AA}^2 \times 10^3$ ) for exp\_579. The Anisotropic displacement factor exponent takes the form:  $-2\pi^2[h^2a^*2U_{11}+...+2hka \times b \times U_{12}]$**

| Atom | $U_{11}$ | $U_{22}$ | $U_{33}$ | $U_{23}$ | $U_{13}$ | $U_{12}$ |
|------|----------|----------|----------|----------|----------|----------|
| O18  | 55.2 (7) | 39.8 (6) | 57.9 (7) | -5.4 (5) | 15.6 (6) | -8.7 (5) |
| C7   | 42.9 (8) | 35.5 (7) | 36.0 (7) | 1.1 (6)  | 3.3 (6)  | 2.1 (6)  |
| C2   | 39.4 (7) | 37.0 (7) | 37.3 (7) | -0.3 (6) | 4.0 (6)  | 1.4 (6)  |
| O23  | 86 (1)   | 62.1 (8) | 51.8 (8) | 17.1 (6) | 20.6 (7) | -3.9 (7) |
| C9   | 41.5 (8) | 36.0 (7) | 33.9 (7) | -1.6 (6) | 6.1 (6)  | -0.3 (6) |
| C3   | 43.0 (8) | 48.9 (9) | 40.3 (8) | -0.9 (7) | 8.2 (6)  | 1.2 (7)  |
| C8   | 43.7 (8) | 32.4 (7) | 38.9 (8) | 2.9 (6)  | 8.8 (6)  | -1.5 (6) |
| C16  | 46.1 (8) | 35.4 (7) | 36.5 (7) | 3.1 (6)  | 5.8 (6)  | 3.4 (6)  |
| C15  | 39.8 (8) | 39.8 (8) | 38.4 (8) | -1.6 (6) | 5.0 (6)  | -0.3 (6) |

|     |            |           |           |           |           |          |
|-----|------------|-----------|-----------|-----------|-----------|----------|
| C1  | 43.5 (8)   | 34.0 (7)  | 36.7 (7)  | 0.8 (6)   | 9.9 (6)   | -3.1 (6) |
| C14 | 46.2 (8)   | 33.1 (7)  | 32.5 (7)  | -0.5 (5)  | 5.2 (6)   | 1.4 (6)  |
| C6  | 51.2 (9)   | 35.4 (7)  | 45.5 (9)  | 1.1 (6)   | 3.0 (7)   | 0.1 (6)  |
| O20 | 109.1 (14) | 49.9 (8)  | 98.1 (13) | -12.0 (8) | 49.0 (11) | -1.9 (8) |
| C10 | 43.2 (8)   | 52.4 (9)  | 41.5 (8)  | -2.6 (7)  | 8.4 (7)   | 0.9 (7)  |
| C13 | 64.5 (11)  | 38.7 (8)  | 40.8 (8)  | 4.1 (6)   | 9.0 (7)   | 7.5 (7)  |
| C11 | 49 (1)     | 67.8 (11) | 51.4 (10) | -1.7 (8)  | 4.0 (8)   | 17.9 (8) |
| C4  | 51.0 (9)   | 53.8 (9)  | 42.0 (8)  | -8.1 (7)  | 6.1 (7)   | 10.1 (7) |
| C5  | 59.5 (10)  | 38.4 (8)  | 47.6 (9)  | -7.1 (7)  | 1.5 (8)   | 6.6 (7)  |
| C17 | 50.0 (9)   | 41.9 (8)  | 44.7 (8)  | -6.1 (6)  | 10.8 (7)  | -8.4 (7) |
| C22 | 64.0 (11)  | 44.3 (8)  | 38.9 (8)  | 3.5 (7)   | 12.4 (7)  | 0.7 (7)  |
| C12 | 70.5 (12)  | 54.8 (10) | 48.9 (10) | 5.6 (8)   | 1.3 (8)   | 25.4 (9) |
| C19 | 57.5 (10)  | 41.1 (8)  | 52.1 (10) | -2.6 (7)  | 2.8 (8)   | -4.2 (7) |
| C21 | 66.3 (12)  | 50.8 (10) | 66.3 (12) | 9.4 (9)   | 5.5 (10)  | -8.5 (9) |

**Table 4 Bond Lengths for exp\_579.**

| Atom | Atom | Length/Å    | Atom | Atom | Length/Å  |
|------|------|-------------|------|------|-----------|
| O18  | C17  | 1.4550 (19) | C16  | C15  | 1.572 (2) |
| O18  | C19  | 1.339 (2)   | C16  | C22  | 1.523 (2) |
| C7   | C2   | 1.400 (2)   | C15  | C1   | 1.565 (2) |
| C7   | C8   | 1.512 (2)   | C15  | C17  | 1.523 (2) |
| C7   | C6   | 1.383 (2)   | C1   | C14  | 1.511 (2) |
| C2   | C3   | 1.382 (2)   | C14  | C13  | 1.382 (2) |
| C2   | C1   | 1.512 (2)   | C6   | C5   | 1.392 (3) |
| O23  | C22  | 1.418 (2)   | O20  | C19  | 1.206 (2) |
| C9   | C8   | 1.511 (2)   | C10  | C11  | 1.385 (3) |
| C9   | C14  | 1.400 (2)   | C13  | C12  | 1.382 (3) |
| C9   | C10  | 1.383 (2)   | C11  | C12  | 1.383 (3) |
| C3   | C4   | 1.392 (2)   | C4   | C5   | 1.381 (3) |
| C8   | C16  | 1.566 (2)   | C19  | C21  | 1.489 (3) |

**Table 5 Bond Angles for exp\_579.**

| Atom | Atom | Atom | Angle/°     | Atom | Atom | Atom | Angle/°     |
|------|------|------|-------------|------|------|------|-------------|
| C19  | O18  | C17  | 116.27 (13) | C17  | C15  | C1   | 110.19 (13) |
| C2   | C7   | C8   | 113.15 (13) | C2   | C1   | C15  | 107.63 (12) |
| C6   | C7   | C2   | 120.33 (14) | C14  | C1   | C2   | 107.50 (12) |
| C6   | C7   | C8   | 126.51 (14) | C14  | C1   | C15  | 106.45 (12) |
| C7   | C2   | C1   | 112.97 (13) | C9   | C14  | C1   | 113.19 (13) |
| C3   | C2   | C7   | 120.06 (14) | C13  | C14  | C9   | 120.08 (15) |

|     |     |     |            |     |     |     |            |
|-----|-----|-----|------------|-----|-----|-----|------------|
| C3  | C2  | C1  | 126.96(14) | C13 | C14 | C1  | 126.71(14) |
| C14 | C9  | C8  | 112.99(13) | C7  | C6  | C5  | 119.35(15) |
| C10 | C9  | C8  | 126.92(14) | C9  | C10 | C11 | 119.37(16) |
| C10 | C9  | C14 | 120.09(14) | C14 | C13 | C12 | 119.53(16) |
| C2  | C3  | C4  | 119.36(16) | C12 | C11 | C10 | 120.45(17) |
| C7  | C8  | C16 | 106.54(12) | C5  | C4  | C3  | 120.59(16) |
| C9  | C8  | C7  | 107.29(12) | C4  | C5  | C6  | 120.28(15) |
| C9  | C8  | C16 | 107.46(11) | O18 | C17 | C15 | 107.04(13) |
| C8  | C16 | C15 | 109.05(11) | O23 | C22 | C16 | 111.30(14) |
| C22 | C16 | C8  | 111.30(13) | C13 | C12 | C11 | 120.47(16) |
| C22 | C16 | C15 | 114.87(12) | O18 | C19 | C21 | 112.40(16) |
| C1  | C15 | C16 | 108.67(11) | O20 | C19 | O18 | 122.41(17) |
| C17 | C15 | C16 | 114.04(12) | O20 | C19 | C21 | 125.19(17) |

**Table 6 Hydrogen Atom Coordinates ( $\text{\AA}\times 10^4$ ) and Isotropic Displacement Parameters ( $\text{\AA}^2\times 10^3$ ) for exp\_579.**

| <b>Atom</b> | <b>x</b> | <b>y</b> | <b>z</b> | <b>U(eq)</b> |
|-------------|----------|----------|----------|--------------|
| H23         | -477     | 1497     | 10478    | 99           |
| H3          | 3782     | 2227     | 5223     | 53           |
| H8          | -288     | 826      | 8341     | 46           |
| H16         | 2564     | 1581     | 9227     | 47           |
| H15         | 4047     | 3355     | 8519     | 48           |
| H1          | 2895     | 4342     | 6687     | 46           |
| H6          | 407      | -1346    | 6851     | 54           |
| H10         | -2811    | 2303     | 7931     | 56           |
| H13         | 446      | 5875     | 6218     | 57           |
| H11         | -3942    | 4335     | 7099     | 67           |
| H4          | 3435     | -330     | 4412     | 59           |
| H5          | 1758     | -2102    | 5214     | 60           |
| H17A        | 1871     | 5573     | 9039     | 56           |
| H17B        | 3376     | 5263     | 9966     | 56           |
| H22A        | 2068     | 3525     | 10743    | 59           |
| H22B        | 346      | 3611     | 9988     | 59           |
| H12         | -2324    | 6103     | 6244     | 69           |
| H21A        | 6015     | 8079     | 7907     | 93           |
| H21B        | 5678     | 9575     | 8676     | 93           |
| H21C        | 4552     | 8983     | 7449     | 93           |

Single crystals of  $C_{20}H_{20}O_3$  [exp\_579]. A Suitable crystal was selected and on a Xcalibur, Eos, Gemini diffractometer. The crystal was kept at 293(2) K during data collection. Using Olex 2 the structure was solved with the ShelXS structure solution program using Direct Methods and refined with the ShelXL [3] refinement package using Least Squares minimisation.

Crystal Data for  $C_{20}H_{20}O_3$  ( $M = 308.36$ ): triclinic, space group P-1 (no. 2),  $a = 8.2328(5) \text{ \AA}$ ,  $b = 8.8177(4) \text{ \AA}$ ,  $c = 11.1343(7) \text{ \AA}$ ,  $\alpha = 95.635(4)^\circ$ ,  $\beta = 97.037(5)^\circ$ ,  $\gamma = 95.431(4)^\circ$ ,  $V = 793.65(8) \text{ \AA}^3$ ,  $Z = 2$ ,  $T = 293(2) \text{ K}$ ,  $\mu(\text{Cu K}\alpha) = 0.686 \text{ mm}^{-1}$ ,  $D_{\text{calc}} = 1.290 \text{ g/mm}^3$ , 4910 reflections measured ( $10.14 \leq 2\theta \leq 150.68$ ), 3114 unique ( $R_{\text{int}} = 0.0212$ ) which were used in all calculations. The final  $R_1$  was 0.0549 ( $>2\sigma(I)$ ) and  $wR_2$  was 0.1568 (all data)

Crystal data of compound 7 CCDC number 1054141

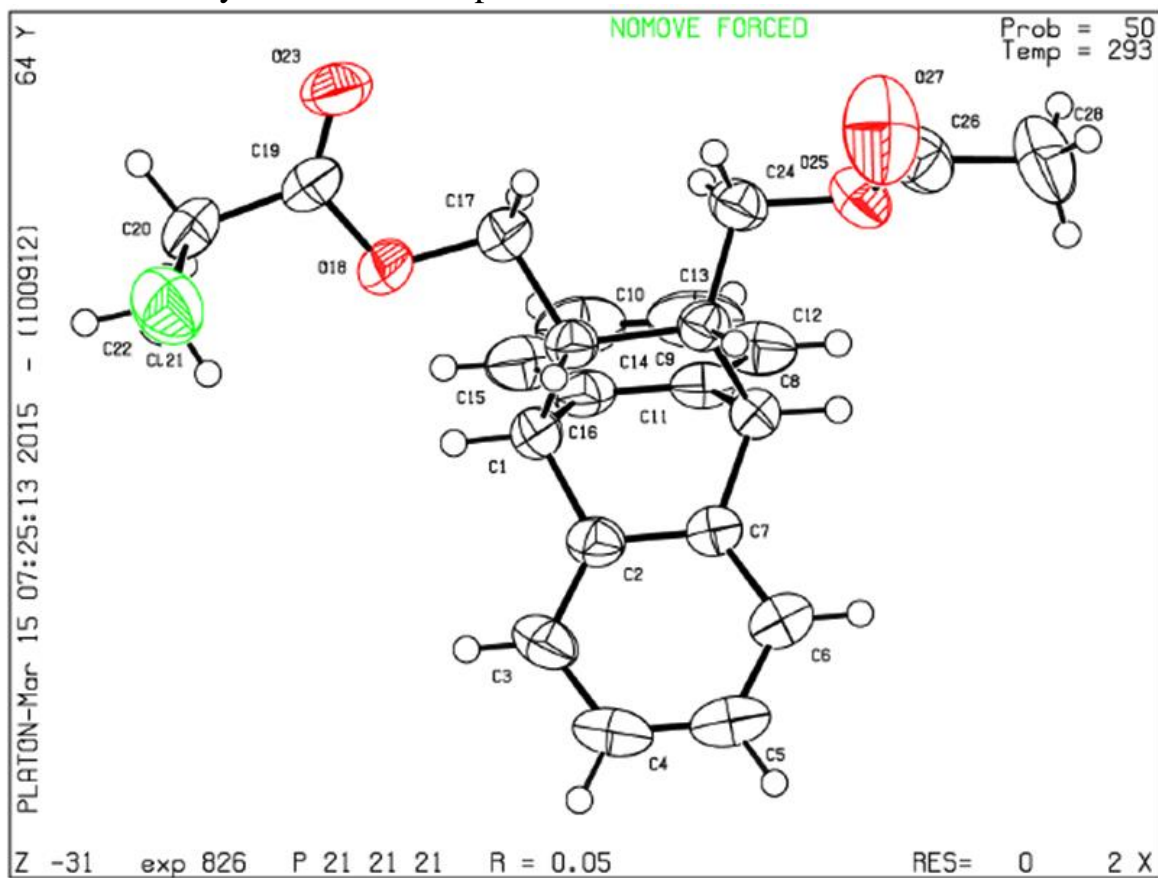

**Table 1 Crystal data and structure refinement for exp\_826.**

|                                             |                                                   |
|---------------------------------------------|---------------------------------------------------|
| Identification code                         | exp_826                                           |
| Empirical formula                           | C <sub>23</sub> H <sub>23</sub> ClO <sub>4</sub>  |
| Formula weight                              | 398.86                                            |
| Temperature/K                               | 293(2)                                            |
| Space group                                 | P2 <sub>1</sub> 2 <sub>1</sub> 2 <sub>1</sub>     |
| a/Å                                         | 10.5625(3)                                        |
| b/Å                                         | 12.0642(4)                                        |
| c/Å                                         | 15.9997(5)                                        |
| α/°                                         | 90.00                                             |
| β/°                                         | 90.00                                             |
| γ/°                                         | 90.00                                             |
| Volume/Å <sup>3</sup>                       | 2038.82(11)                                       |
| Z                                           | 4                                                 |
| ρ <sub>calc</sub> /g/cm <sup>3</sup>        | 1.299                                             |
| μ/mm <sup>-1</sup>                          | 1.871                                             |
| F(000)                                      | 840.0                                             |
| Crystal size/mm <sup>3</sup>                | 0.31 × 0.28 × 0.27                                |
| Radiation                                   | CuKα (λ = 1.54184)                                |
| 2θ range for data collection/°              | 9.18 to 143.34                                    |
| Index ranges                                | -12 ≤ h ≤ 12, -14 ≤ k ≤ 13, -14 ≤ l ≤ 19          |
| Reflections collected                       | 4965                                              |
| Independent reflections                     | 3323 [R <sub>int</sub> = 0.0229,                  |
| Data/restraints/parameters                  | 3323/0/255                                        |
| Goodness-of-fit on F <sup>2</sup>           | 1.046                                             |
| Final R indexes [I ≥ 2σ (I)]                | R <sub>1</sub> = 0.0477, wR <sub>2</sub> = 0.1316 |
| Final R indexes [all data]                  | R <sub>1</sub> = 0.0504, wR <sub>2</sub> = 0.1363 |
| Largest diff. peak/hole / e Å <sup>-3</sup> | 0.24/-0.38                                        |
| Flack parameter                             | -0.01(2)                                          |

**Table 2 Fractional Atomic Coordinates ( $\times 10^4$ ) and Equivalent Isotropic Displacement Parameters ( $\text{\AA}^2 \times 10^3$ ) for exp\_826.  $U_{eq}$  is defined as 1/3 of of the trace of the orthogonalised  $U_{ij}$  tensor.**

| Atom | x           | Y           | z           | U(eq)      |
|------|-------------|-------------|-------------|------------|
| Cl21 | 3378.4 (11) | 8066.1 (9)  | 9648.7 (5)  | 83.4 (3)   |
| O25  | 4639.5 (18) | 5764.9 (18) | 4648.8 (12) | 52.8 (5)   |
| O18  | 2911 (2)    | 7397.5 (16) | 7771.2 (13) | 63.2 (6)   |
| O23  | 3586 (2)    | 9137.7 (16) | 7644.0 (13) | 63.7 (6)   |
| O27  | 6639 (2)    | 6217 (3)    | 4889 (2)    | 104.6 (11) |
| C19  | 3034 (3)    | 8446 (2)    | 8015.3 (18) | 48.7 (6)   |
| C2   | 2544 (2)    | 4074 (2)    | 7222.0 (16) | 42.9 (6)   |
| C7   | 3100 (2)    | 3612 (2)    | 6511.0 (15) | 40.5 (5)   |
| C9   | 4085 (2)    | 5399.5 (19) | 6099.6 (15) | 38.0 (5)   |
| C16  | 1411 (2)    | 5419 (2)    | 6346.4 (18) | 45.6 (6)   |
| C26  | 5864 (3)    | 5796 (3)    | 4467 (2)    | 60.9 (8)   |
| C24  | 4232 (3)    | 6278 (2)    | 5420.0 (17) | 46.9 (6)   |
| C11  | 1927 (3)    | 4933 (2)    | 5634.6 (16) | 44.6 (6)   |
| C8   | 3214 (2)    | 4425.1 (19) | 5790.1 (14) | 39.1 (5)   |
| C6   | 3515 (3)    | 2523 (2)    | 6518.0 (18) | 49.6 (6)   |
| C1   | 2222 (2)    | 5285 (2)    | 7114.7 (16) | 43.7 (6)   |
| C10  | 3525 (2)    | 5866.0 (19) | 6936.6 (15) | 39.3 (5)   |
| C15  | 269 (3)     | 5984 (3)    | 6297 (2)    | 60.6 (8)   |
| C5   | 3363 (3)    | 1899 (2)    | 7236 (2)    | 59.7 (8)   |
| C3   | 2411 (3)    | 3451 (3)    | 7938.3 (18) | 53.6 (7)   |
| C12  | 1307 (3)    | 4998 (3)    | 4878.4 (19) | 58.0 (7)   |
| C17  | 3427 (3)    | 7118 (2)    | 6955.6 (18) | 50.6 (6)   |
| C4   | 2822 (3)    | 2360 (3)    | 7941 (2)    | 61.9 (8)   |
| C20  | 2379 (3)    | 8633 (2)    | 8845 (2)    | 62.1 (8)   |
| C13  | 147 (4)     | 5562 (3)    | 4838 (3)    | 75.7 (11)  |
| C14  | -351 (3)    | 6044 (3)    | 5531 (3)    | 73.3 (10)  |
| C22  | 1062 (4)    | 8127 (3)    | 8903 (3)    | 76.8 (10)  |
| C28  | 6116 (4)    | 5215 (4)    | 3655 (2)    | 89.6 (13)  |

**Table 3 Anisotropic Displacement Parameters ( $\text{\AA}^2 \times 10^3$ ) for exp\_826. The Anisotropic displacement factor exponent takes the form:  $-2\pi^2[h^2a^2U_{11}+2hka*b*U_{12}+\dots]$ .**

| Atom | $U_{11}$  | $U_{22}$  | $U_{33}$  | $U_{23}$  | $U_{13}$  | $U_{12}$   |
|------|-----------|-----------|-----------|-----------|-----------|------------|
| Cl21 | 94.8 (7)  | 95.7 (7)  | 59.7 (4)  | 3.0 (4)   | 1.1 (5)   | -1.0 (6)   |
| O25  | 47.2 (10) | 66.6 (12) | 44.6 (9)  | 4.8 (9)   | 6.4 (8)   | -9.1 (10)  |
| O18  | 83.5 (15) | 37.5 (9)  | 68.5 (13) | -12.0 (9) | 27.1 (11) | -13.8 (10) |
| O23  | 86.2 (16) | 39.9 (9)  | 65.0 (12) | 4.2 (9)   | -4.9 (12) | -11.3 (11) |
| O27  | 44.8 (13) | 157 (3)   | 112 (2)   | -42 (2)   | -0.6 (14) | -4.8 (16)  |
| C19  | 57.1 (15) | 32.6 (11) | 56.4 (14) | -2.8 (11) | -8.2 (13) | 2.8 (12)   |
| C2   | 42.4 (12) | 40.0 (12) | 46.2 (13) | 3.0 (11)  | 0.6 (11)  | -7.7 (11)  |
| C7   | 41.9 (12) | 36.2 (11) | 43.4 (12) | 2.5 (10)  | -2.7 (10) | -1.3 (10)  |

|     |           |           |           |           |            |            |
|-----|-----------|-----------|-----------|-----------|------------|------------|
| C9  | 36.0 (11) | 37.1 (11) | 40.9 (11) | 2.8 (10)  | 0.5 (10)   | 3.2 (9)    |
| C16 | 37.8 (12) | 34.7 (11) | 64.3 (15) | 8.0 (11)  | 5.4 (11)   | -4.1 (10)  |
| C26 | 48.9 (15) | 75 (2)    | 58.7 (17) | 9.3 (16)  | 6.4 (14)   | 5.5 (15)   |
| C24 | 45.5 (13) | 45.7 (13) | 49.5 (13) | 8.1 (12)  | 8.2 (12)   | -0.5 (11)  |
| C11 | 42.2 (12) | 37.6 (11) | 54.2 (13) | 10.1 (11) | -3.5 (11)  | -7.1 (11)  |
| C8  | 43.0 (12) | 36.6 (11) | 37.8 (11) | -0.1 (9)  | 1.6 (10)   | 0.7 (10)   |
| C6  | 48.8 (14) | 39.0 (12) | 60.8 (15) | 0.6 (12)  | -6.8 (12)  | 0.0 (11)   |
| C1  | 43.7 (13) | 39.3 (12) | 48.2 (13) | -1.0 (11) | 10.8 (11)  | -1 (1)     |
| C10 | 39.3 (12) | 35.5 (11) | 43.0 (12) | 1.4 (10)  | 2.7 (10)   | -1.9 (10)  |
| C15 | 41.8 (14) | 48.9 (15) | 91 (2)    | 16.6 (15) | 5.8 (15)   | 2.1 (13)   |
| C5  | 56.5 (17) | 40.6 (13) | 82 (2)    | 16.1 (14) | -16.9 (16) | -7.4 (13)  |
| C3  | 55.4 (15) | 60.4 (16) | 44.9 (13) | 9.9 (13)  | 2.8 (12)   | -17.3 (14) |
| C12 | 59.1 (17) | 53.3 (15) | 61.6 (16) | 16.1 (14) | -12.6 (14) | -10.0 (14) |
| C17 | 59.3 (16) | 39.6 (12) | 52.9 (14) | -3.8 (11) | 11.0 (13)  | -4.4 (12)  |
| C4  | 64.9 (18) | 56.3 (16) | 64.5 (17) | 25.8 (15) | -8.2 (15)  | -17.6 (15) |
| C20 | 81 (2)    | 38.5 (13) | 66.2 (18) | -8.7 (13) | 6.2 (17)   | 10.9 (15)  |
| C13 | 64.2 (19) | 69 (2)    | 94 (3)    | 36 (2)    | -32 (2)    | -13.6 (17) |
| C14 | 45.2 (16) | 58.7 (18) | 116 (3)   | 28 (2)    | -9.1 (19)  | 4.3 (15)   |
| C22 | 62.6 (19) | 86 (2)    | 82 (2)    | -13 (2)   | 14.7 (18)  | 15.6 (19)  |
| C28 | 82 (3)    | 122 (3)   | 64.8 (19) | -10 (2)   | 29.1 (19)  | -1 (3)     |

**Table 4 Bond Lengths for exp\_826.**

| Atom | Atom | Length/Å  | Atom | Atom | Length/Å  |
|------|------|-----------|------|------|-----------|
| Cl21 | C20  | 1.799 (4) | C16  | C15  | 1.388 (4) |
| O25  | C26  | 1.326 (4) | C16  | C11  | 1.392 (4) |
| O25  | C24  | 1.446 (3) | C16  | C1   | 1.506 (4) |
| O18  | C19  | 1.330 (3) | C26  | C28  | 1.501 (5) |
| O18  | C17  | 1.454 (3) | C11  | C12  | 1.378 (4) |
| O23  | C19  | 1.179 (3) | C11  | C8   | 1.511 (4) |
| O27  | C26  | 1.177 (4) | C6   | C5   | 1.383 (4) |
| C19  | C20  | 1.515 (4) | C1   | C10  | 1.571 (3) |
| C2   | C3   | 1.378 (4) | C10  | C17  | 1.514 (3) |
| C2   | C7   | 1.396 (4) | C15  | C14  | 1.392 (5) |
| C2   | C1   | 1.510 (3) | C5   | C4   | 1.381 (5) |
| C7   | C6   | 1.385 (4) | C3   | C4   | 1.385 (4) |
| C7   | C8   | 1.519 (3) | C12  | C13  | 1.403 (5) |
| C9   | C24  | 1.526 (3) | C20  | C22  | 1.521 (5) |
| C9   | C10  | 1.569 (3) | C13  | C14  | 1.358 (6) |
| C9   | C8   | 1.573 (3) |      |      |           |

**Table 5 Bond Angles for exp\_826.**



| Atom Atom Atom | Angle/°     | Atom Atom Atom | Angle/°     |
|----------------|-------------|----------------|-------------|
| C26 O25 C24    | 117.7 (2)   | C16 C11 C8     | 112.8 (2)   |
| C19 O18 C17    | 116.6 (2)   | C11 C8 C7      | 108.4 (2)   |
| O23 C19 O18    | 125.0 (3)   | C11 C8 C9      | 105.95 (19) |
| O23 C19 C20    | 124.2 (2)   | C7 C8 C9       | 106.84 (19) |
| O18 C19 C20    | 110.8 (2)   | C5 C6 C7       | 119.1 (3)   |
| C3 C2 C7       | 120.2 (3)   | C16 C1 C2      | 108.9 (2)   |
| C3 C2 C1       | 126.8 (3)   | C16 C1 C10     | 107.6 (2)   |
| C7 C2 C1       | 112.9 (2)   | C2 C1 C10      | 104.8 (2)   |
| C6 C7 C2       | 120.3 (2)   | C17 C10 C9     | 113.6 (2)   |
| C6 C7 C8       | 126.4 (2)   | C17 C10 C1     | 112.4 (2)   |
| C2 C7 C8       | 113.2 (2)   | C9 C10 C1      | 109.0 (19)  |
| C24 C9 C10     | 113.4 (2)   | C16 C15 C14    | 119.0 (3)   |
| C24 C9 C8      | 110.7 (2)   | C4 C5 C6       | 120.5 (3)   |
| C10 C9 C8      | 108.43 (19) | C2 C3 C4       | 119.3 (3)   |
| C15 C16 C11    | 120.0 (3)   | C11 C12 C13    | 118.9 (3)   |
| C15 C16 C1     | 126.4 (3)   | O18 C17 C10    | 106.0 (2)   |
| C11 C16 C1     | 113.6 (2)   | C5 C4 C3       | 120.6 (3)   |
| O27 C26 O25    | 124.4 (3)   | C19 C20 C22    | 114.3 (3)   |
| O27 C26 C28    | 125.1 (3)   | C19 C20 C121   | 107.6 (2)   |
| O25 C26 C28    | 110.5 (3)   | C22 C20 C121   | 109.9 (2)   |
| O25 C24 C9     | 110.0 (2)   | C14 C13 C12    | 120.6 (3)   |
| C12 C11 C16    | 120.6 (3)   | C13 C14 C15    | 120.9 (3)   |
| C12 C11 C8     | 126.5 (3)   |                |             |

**Table 6 Hydrogen Atom Coordinates ( $\text{\AA} \times 10^4$ ) and Isotropic Displacement Parameters ( $\text{\AA}^2 \times 10^3$ ) for exp\_826.**

| Atom | x    | y    | z    | U(eq) |
|------|------|------|------|-------|
| H9   | 4925 | 5093 | 6220 | 46    |
| H24A | 3430 | 6652 | 5333 | 56    |
| H24B | 4851 | 6825 | 5594 | 56    |
| H8   | 3553 | 4070 | 5287 | 47    |
| H6   | 3891 | 2216 | 6046 | 59    |
| H1   | 1809 | 5590 | 7613 | 52    |
| H10  | 4104 | 5649 | 7386 | 47    |
| H15  | -78  | 6316 | 6769 | 73    |
| H5   | 3626 | 1164 | 7245 | 72    |
| H3   | 2049 | 3759 | 8415 | 64    |
| H12  | 1651 | 4673 | 4403 | 70    |
| H17A | 4254 | 7453 | 6881 | 61    |
| H17B | 2872 | 7379 | 6515 | 61    |
| H4   | 2732 | 1935 | 8422 | 74    |
| H20  | 2305 | 9434 | 8937 | 74    |

|      |       |      |      |     |
|------|-------|------|------|-----|
| H13  | -284  | 5605 | 4333 | 91  |
| H14  | -1117 | 6421 | 5493 | 88  |
| H22A | 1126  | 7334 | 8883 | 115 |
| H22B | 557   | 8382 | 8443 | 115 |
| H22C | 673   | 8347 | 9419 | 115 |
| H28A | 5775  | 4478 | 3677 | 134 |
| H28B | 7013  | 5178 | 3560 | 134 |
| H28C | 5722  | 5618 | 3207 | 134 |

Single crystals of  $C_{23}H_{23}ClO_4$ . A suitable crystal was selected and on a diffractometer. The crystal was kept at 293(2) K during data collection. Using Olex2 the structure was solved with the Superflip structure solution program using Charge Flipping and refined with the ShelXL refinement package using Least Squares minimisation.

**Crystal Data** for  $C_{23}H_{23}ClO_4$  ( $M = 398.86$  g/mol):, space group  $P2_12_12_1$  (no. 19),  $a = 10.5625(3)$  Å,  $b = 12.0642(4)$  Å,  $c = 15.9997(5)$  Å,  $V = 2038.82(11)$  Å<sup>3</sup>,  $Z = 4$ ,  $T = 293(2)$  K,  $\mu(\text{CuK}\alpha) = 1.871$  mm<sup>-1</sup>,  $D_{\text{calc}} = 1.299$  g/cm<sup>3</sup>, 4965 reflections measured ( $9.18^\circ \leq 2\theta \leq 143.34^\circ$ ), 3323 unique ( $R_{\text{int}} = 0.0229$ , which were used in all calculations. The final  $R_1$  was 0.0477 ( $>2\sigma(I)$ ) and  $wR_2$  was 0.1363 (all data).
